# Supplementary material for: Aerosol-related effects on the occurrence of heterogeneous ice formation over Lauder, New Zealand/Aotearoa
Source: Copernicus journal article supplement (doi:10.5194/egusphere-2023-2173), 2023-10-17
Supplement: Supplementary file [file egusphere-2023-2173-AC1-supplement.pdf]

We are grateful for the reviewers' careful reading of our manuscript and their exceptionally helpful comments. Their suggestions helped to significantly improve the content and structure of this manuscript. In this author comment, we reply (in blue font) to each of both reviewer's comments (in black font) and explain our suggested changes which we made in the attached revised version of the manuscript (deleted parts marked up in strikethrough red font, and newly added parts marked up in blue font).

## RC1

### Summary:

This paper focuses on an inter-comparison between polarized lidar data in New Zealand, Chile and Germany. The different locations of these lidar systems allows the authors to examine the impact of different aerosol environs on heterogeneous ice formation. The relationship between aerosol and ice formation is a complex one and an extremely high priority for improving model simulations. The data underlying this paper provides a unique opportunity to separate out the influences of different aerosol loads and allows the authors to extend existing research on heterogeneous ice formation. I think this paper is a valuable contribution to the scientific literature and hope that future work will be done to extend this line of research.

### Minor comments:

Some of the paragraphs are excessively long, particularly in the introduction and conclusions, which serves to obscure some of the points of the paper. Splitting some of these paragraphs would lead to an improved experience for future readers.

Thank you for pointing that out. We therefore suggest line breaks in the introduction before "In observational studies," on original line 27, before "The strong contrast in aerosol particle load and composition" on original line 31, before "On the other hand, marine organic aerosol" on original line 42, before "The representation of above mentioned contrasts" on original line 49, before "In the Southern Hemisphere mid-latitudes," on original line 71, and before "This is strong motivation" on original line 82.

In the summary section, we suggest line breaks before "Based on a long-term radiosonde dataset" on original line 309, before "Next, the general aerosol conditions over Lauder" on original line 313, before "Overall, ice-formation efficiency in clouds above Lauder" on original line 320, before "In conclusion, it can be stated" on original line 326, before "Our study made use of a unique" on original line 330, and before "Future studies might also make further use" on original line 338.

The sentence starting on line 28 ("Even though.....") is confusing to read. I would appreciate it if this sentence could be rewritten for clarity.

For better understanding, we split up this sentence in two and slightly reformulated it.

The two sentences starting on line 54 (“Too few.... . Via too strong....”) are separated in a way which muddles the meaning. Once again, I think this should be rewritten for clarity.

Again, we split up this sentence in two.

Line 96 change “are” to “have been”

We changed that tense.

The sentence starting on line 118 (“By considering.....”) is confusing to read due to the complex clausal structure. This should be rewritten for simplicity.

Again, we split up this sentence in two.

For completeness, a reference should be included after the statement that dew point spreads of 2k are needed for cloud formation (line 217)

We added a reference.

This discussion of figure 10 is a little underdeveloped (lines 298 - 301). I’m unsure if an unfamiliar reader would be able to interpret the results of figure 10 based on the existing discussion. I also think additional discussion here is warranted, given the results of the figure.

We first added a clearer and more extended explanation of the quantities used in this figure, and secondly, we added a sentence at the end stating the main conclusion drawn from this figure.

## RC2

### General comments

In this paper, the efficiency of ice formation in clouds over New Zealand has been investigated, focusing on the effect of the different aerosol loads and their origin above the area of study. The study is focused in clouds for which the top temperature falls within the heterogeneous freezing range (-40° to 0° C) making use of a combined dataset comprising of ground-based lidar observations for detection of liquid and ice-containing clouds, radiosondes and Global Data Assimilation System (GDAS) for profiles of atmospheric parameters, CAMS-MACC model runs for aerosol re-analyses data, HYSPLIT model runs for air-masses backward trajectories, and TRACE profiles for air-mass source attribution analysis. A case study is selected to demonstrate how the different type datasets are/can be used to study the relationship between the mixed-phase cloud formation and the aerosol load and type, before presenting the overall results and statistics from the analysis on the clouds and the air-masses using the available long-term datasets. Overall, the manuscript is well-structured, well-written, and its scientific significance makes it suitable for publication, after some minor revisions to be kindly considered from the authors.

## Specific comments

- Section 2.1: I think a brief description of the lidar specifications (e.g. laser energy and repetition rate, telescope diameter, FOV, spatial resolution, measured optical products) could be added here.

We added a complete but still brief description of the specifications and products.

- Lines 103-104: I kindly suggest to name also the lidar products that are used in the study (backscatter coef., depolarization ratio) instead of the lidar signals.

You are right, this sentence was misleading anyway, since the polarization signals are of course themselves backscatter signals. We used the co- and cross-polarized signals at 532 nm wavelength to retrieve range-corrected signals and volume depolarization ratios, but also to calculate aerosol optical properties like particle depolarization ratios and particle backscatter coefficients. Therefore, we changed the sentence, which states now that we used co- and cross-polarized signals.

- Lines 110-111: The authors state that the volume depolarization ratio is used along with the backscatter coef. to identify the cloud base and top, but in line 160 and Fig. 1 the particle depolarization ratio is used instead in the visual inspection for clouds in the scene. Which product is really used? If both, then please clarify.

The volume depolarization ratio and the range-corrected signal are used in the evaluation.

As it better adheres to standard ways of presenting aerosol optical properties, uncalibrated attenuated backscatter coefficient and particle depolarization ratio plots (and calibrated particle backscatter for the profile in Fig. 1ci)) are presented for the measurement example.

- Lines 113-114: Do the authors use a threshold in the volume depolarization ratio values to discriminate the clouds (liquid or ice-containing) from other depolarizing particles (e.g. dust)? Do the authors account for the contribution of molecular depolarization in the volume depolarization ratio? Maybe a more detailed description is needed here.

No, we don't use a fixed threshold of volume depolarization ratio, neither for the discrimination of cloud phase (this is the advantage of an individual visual inspection, that it better allows to account for specific structures of the full profile to rule out misclassification due to multiple scattering or specular reflection, (Ansmann et al., 2009, Seifert et al., 2010)) nor to differentiate cloud and aerosol layers. The latter usually relies rather on peak-signal-to-base-signal ratio than on polarization (Wang and Sassen, 2001) for which, again based on individual visual inspection, mainly the range-corrected signal was used.

In the case of the measurement example, the total (molecular plus particle) depolarization ratio at 4–5 km is about 0.2% to 0.3%. Since this is an almost aerosol free region, this value should be close to the molecular depolarization

ratio seen by this system, which was previously reported by Nakamae et al. (2016) as 0.37%. This is a low value which therefore does not interfere with cloud phase discrimination based on the volume depolarization, as for example Ansmann et al. (2009) stated “A very accurate determination of the [volume linear] depolarization ratio is not needed in this study. Only a clear discrimination of [liquid] water droplet depolarization (typically <0.2, including multiple scattering effects) and ice crystal depolarization (usually >0.4) is of importance”. We added a comparable sentence to provide more detail.

- Line 165 “heights up to above 14 km”: It is not clear if these elevated layers were observed during the case study. If yes, what is the height range that the elevated smoke layers are detected, up to 14 km or above 14 km? And, what is the base of the elevated smoke layer?

We deleted the specific height information in this sentence as it is indeed misleading. This statement was made that way because for regular cloud classification, we only processed (by visual inspection) data up to 15 km a.g.l., so that, repeatedly, merely the lower parts of these smoke layers were visible during evaluation. The statement was not intended to be specifically made for this case study only but for a general description of the broader period in which the case study lies, namely January 2020, where layers of elevated smoke of the record-breaking Australian wildfires 2019/20 were observed at multiple days, e.g., on 15 January 2020 (roughly 11–13 km), 17 January 2020 (roughly 13–15 km), 18 January (diffuse from roughly 12 km up to above 15 km), 22 January 2020 (again diffuse from roughly 10 km up to above 15 km).

On 19 to 20 January 2020, a smoke layer was present with a base height at roughly 13 km reaching up to 15 km or possibly even slightly above. But the detailed description of these smoke layers is not scope of this study.

- Section 3.3: It is not so clear that only the WD (well-defined) clouds are used in the cloud statistics and also in the following section (sec. 3.4 and Fig. 9 and 10) for the separation of clouds based on air mass statistics. Please clarify which sample of clouds (total or WD) the authors use

Indeed, we later use only the well-defined clouds. We made this clearer in the captions of Figs. 9 and 10 and in Sect. 3.4 by adding “well-defined”.

- Figure 9b: Kindly consider to use a different line color for clusters 3&4, since lightblue might be challenging for some readers to discriminate it from the cluster 2 blue line.

We changed the color of the line for “Clusters 3&4” to a better distinguishable one (a darker green, “olivedrab”, called now “green” in the caption).

## Technical corrections

- Line 307 “the Seifert et al. (2010, 2015), methods to asses ...”: is the coma after the parenthesis necessary?

No, it is not needed. We corrected that typo.

- Figure 8: duplicated for in “Fraction of ice-containing clouds as function of cloud-top temperature in intervals of 5 K for for Leipzig”

We corrected that typo.

- Line 295: typo in “...ice formation efficiency, **albeit** within statistical uncertainty.”?

This additional part of the sentence should indicate that the lower ice formation efficiency in that temperature range is not significantly lower than in Punta Arenas (looking at the error bars denoting the statistical uncertainty). We believe that it needs to be stated like this and therefore, we would like to propose to leave it as it is. If in doubt, this could be finally checked in proof reading.

- Section 4: Since the full “New Zealand” is used throughout the manuscript I would suggest to use it also here and avoid the abbreviation NZ (e.g. lines 304, 306, 310)

We deleted the abbreviation and added the full name as in the sections above for the first use of Lauder (original line 304) and Invercargill (original line 310) in that summary section, and deleted it completely for the second use of Lauder in that section (original line 306). Furthermore, three typos in that section were corrected: on original line 303 “Conclusion” to “conclusion,”, on original line 318 “Aoetearoa” to “Aotearoa”, and on original line 323 “Aeotearoa” to “Aotearoa”.

## References:

Ansmann, A., Tesche, M., Seifert, P., Althausen, D., Engelmann, R., Fruntke, J., Wandinger, U., Mattis, I., and Müller, D.: Evolution of the ice phase in tropical altocumulus: SAMUM lidar observations over Cape Verde, *J. Geophys. Res.*, 114, D17208, <https://doi.org/10.1029/2008JD011659>, 2009.

Seifert, P., Ansmann, A., Mattis, I., Wandinger, U., Tesche, M., Engelmann, R., Müller, D., Pérez, C., and Haustein, K.: Saharan dust and heterogeneous ice formation: Eleven years of cloud observations at a central European EARLINET site, *J. Geophys. Res. Atmos.*, 115, D20201, <https://doi.org/10.1029/2009JD013222>, 2010

Wang, Z. and Sassen, K.: Cloud type and macrophysical property retrieval using multiple remote sensors, *J. Appl. Meteorol.*, 40, 1665–1682, [https://doi.org/10.1175/1520-0450\(2001\)040<1665:CTAMPR>2.0.CO;2](https://doi.org/10.1175/1520-0450(2001)040<1665:CTAMPR>2.0.CO;2), 2001.

# Aerosol-related effects on the occurrence of heterogeneous ice formation over Lauder, New Zealand/Aotearoa

Julian Hofer<sup>1</sup>, Patric Seifert<sup>1</sup>, J. Ben Liley<sup>2</sup>, Martin Radenz<sup>1</sup>, Osamu Uchino<sup>3,4</sup>, Isamu Morino<sup>3</sup>, Tetsu Sakai<sup>4</sup>, Tomohiro Nagai<sup>4</sup>, and Albert Ansmann<sup>1</sup>

<sup>1</sup>Leibniz Institute for Tropospheric Research (TROPOS), Leipzig, Germany

<sup>2</sup>Lauder Atmospheric Research Station, National Institute of Water & Atmospheric Research/Taihoru Nukurangi (NIWA), Lauder, New Zealand/Aotearoa

<sup>3</sup>National Institute for Environmental Studies (NIES), Tsukuba, Japan

<sup>4</sup>Meteorological Research Institute (MRI), Japan Meteorological Agency (JMA), Tsukuba, Japan

**Correspondence:** Julian Hofer (hofer@tropos.de)

**Abstract.** The presented study investigates the efficiency of heterogeneous ice formation in natural clouds over Lauder, New Zealand/Aotearoa. Aerosol conditions in the middle troposphere above Lauder are subject to huge contrasts. Clean, pristine airmasses from Antarctica and the Southern Ocean arrive under southerly flow conditions while high aerosol loads can occur when air masses are advected from nearby Australia. This study assesses how these contrasts in aerosol load affect the ice formation efficiency in stratiform midlevel clouds in the heterogeneous freezing range ( $-40^{\circ}\text{C}$  to  $0^{\circ}\text{C}$ ). For this purpose, an 11-year dataset was analyzed from a dual-wavelength polarization lidar system operated by National Institute of Water & Atmospheric Research (NIWA) at Lauder in collaboration with the National Institute for Environmental Studies in Japan and the Meteorological Research Institute of the Japan Meteorological Agency. These data were used to investigate the efficiency of heterogeneous ice formation in clouds over the site as a function of cloud-top temperature as in previous studies at other locations. The Lauder cloud dataset was put into context with lidar studies from contrasting regions such as Germany and southern Chile. The ice formation efficiency found at Lauder is lower than in polluted mid-latitudes (i.e., Germany) but higher than for example in southern Chile. Both, Lauder and southern Chile are subject to generally low free-tropospheric aerosol loads, which suggests that the low ice formation efficiency at these two sites is related to low ice-nucleating particle (INP) concentrations. However, Lauder sees episodes of continental aerosol, more than does southern Chile, which seems to lead to the moderately increased ice formation efficiency. Trajectory-based tools and aerosol model re-analyses are used to relate this cloud dataset to the aerosol load and the air mass sources. Both analyses point clearly to higher ice formation efficiency for clouds which are more strongly influenced by continental aerosol, and to lower ice formation efficiency for clouds which are more influenced by Antarctic/marine aerosol and air masses.

## 1 Introduction

Comprehension of cloud formation and cloud lifecycle is essential for adequately describing the Earth's climate system (Stephens, 2005). An important step towards such understanding lies in disentangling and eventually quantifying the com-

plex processes of aerosol-cloud interaction (Lohmann and Feichter, 2005). Aerosol particles are required in the formation of liquid droplets and ice crystals from vapor phase by acting as cloud condensation nuclei (CCN) and as ice nucleating particles (INP) in the heterogeneous freezing temperature range from approximately  $-40^{\circ}\text{C}$  to  $0^{\circ}\text{C}$ , respectively. In this temperature  
25 range, mixed-phase clouds can exist. They are of special interest in current atmospheric research because they can lead to both cooling or warming at Earth's surface (Sun and Shine, 1994; Hogan et al., 2003; Shupe and Intrieri, 2004; Zuidema et al., 2005) and because of their critical role for precipitation (Korolev et al., 2017).

In observational studies, it is difficult to separate thermodynamical, dynamical, and aerosol-related effects on cloud microphysics. ~~Even though dynamics and thermodynamics are seen as the dominant effects, significant influence of aerosol  
30 conditions on cloud properties, cloud evolution, and precipitation have been confirmed in observational and modeling studies~~ Dynamics and thermodynamics are considered to preside over aerosol-related effects on cloud microphysical properties. Nevertheless, significant influence of aerosol conditions on cloud properties, cloud evolution, and precipitation has been confirmed in observational and modeling studies (Seifert et al., 2012; Possner et al., 2017; Solomon et al., 2018; Zhang et al., 2018; Desai et al., 2019).

35 The strong contrast in aerosol particle load and composition between the southern and northern hemisphere mid-latitudes (Tegen et al., 1997) can therefore be expected to lead as well to differences in cloud abundance and cloud properties in those regions. Indeed, the recurrent abundance of supercooled liquid cloud layers over the Southern Ocean (Hu et al., 2010; Tan et al., 2014; Huang et al., 2015) has a sensitive impact on the energy balance of this area (Trenberth and Fasullo, 2010; Bodas-Salcedo et al., 2014, 2016, 2019). These regional differences in the occurrence of supercooled liquid clouds might be caused  
40 by the lack of INP in the largely pristine Southern Ocean (Hamilton et al., 2014). Ship-borne INP measurements presented by Welti et al. (2020) and McCluskey et al. (2018a) confirm the rareness of INP in the Southern Ocean. Tatzelt et al. (2022), also from ship-borne INP measurements, conclude based on correlation between aerosol physico-chemical properties and proxies of biological activity in the ocean as well as backward-trajectory analyses that indications for local INP sources are rare. Therefore, Tatzelt et al. (2022) interpret the INP populations as mixed long-range-transported biogenic and mineral dust INP  
45 from coastal or terrestrial sources which are sparse and distant (Vergara-Temprado et al., 2017).

On the other hand, marine organic aerosol are considered to be potentially an important source of INP especially over remote oceanic region such as the Southern Ocean (Wilson et al., 2015; DeMott et al., 2016). By introducing marine organic aerosol into an Earth system model via a physically based parametrization instead of empirical proxies of biological activity, Zhao et al. (2021) conclude that marine INP dominate primary ice nucleation in the Southern Ocean at pressure levels above 400 hPa.  
50 McCluskey et al. (2019) compared ship-borne INP measurements with model representations and found sea spray aerosol as the dominant contributor to primary ice nucleation in the Southern Ocean, though, also stressing the potential role of long-range transported mineral dust and the need for modeling and observational studies on vertical and seasonal variability in INP and aerosol composition over remote regions.

The representation of above mentioned contrasts in weather and climate models may impact these model's performance.  
55 Coupled Model Intercomparison Project (CMIP) models consistently showed and still show a positive bias in the absorbed shortwave radiation over the Southern Ocean (Trenberth and Fasullo, 2010; Grise et al., 2015; Zelinka et al., 2020; Varma



et al., 2020; Kajtar et al., 2021; Schuddeboom and McDonald, 2021). This is largely attributed to simulating too much ice in Southern Ocean clouds compared to observations, which is another common bias in CMIP models (Kuma et al., 2023). ~~Too few liquid clouds lead to less reflected shortwave radiation. Via too strong heating at the surface, this leads to too large heat uptake in the ocean~~ A reduced frequency of liquid clouds leads to too less reflected short wave radiation. This leads to an enhanced heating at the surface which in turn causes a too large ocean heat uptake (Franklin et al., 2013; Hyder et al., 2018). The reasons for these observed differences and widespread model biases remain partly unresolved and therefore disputed, but hemispheric contrasts in aerosol load and type, including the low abundance of INP from terrestrial sources, in combination with atmospheric dynamics are suspected to play a role (Radenz et al., 2021a).

60 Mallet et al. (2023) and Humphries et al. (2023) highlight the heterogeneity of the pristine Southern Ocean region and suggest coordinated, long-term, and contrasting observational studies for validating and improving the models. Already Minikin et al. (2003) performed aircraft in situ measurements over the Northern Atlantic and Southern Ocean and found a factor of 2–3 lower aerosol concentration in the free troposphere over the latter compared to over the former. Gayet et al. (2004) used the same measurements focusing on cirrus evolution and properties and derived lower cirrus ice crystal number concentrations in 70 the southern than in the northern mid-latitudes. Using space-borne polarization lidar, Choi et al. (2010) demonstrated negative correlation of supercooled cloud fraction with dust aerosol frequency. However, Mace et al. (2021a) used ship-based lidar observations (Mace et al., 2021b; McFarquhar et al., 2021) to underline that such space-borne lidar phase statistics of mixed-phase clouds have a low bias in mixed-phase cloud occurrence over the Southern Ocean. To try to overcome space-borne lidar observable and detection limits, Villanueva et al. (2020) used space-borne observations in combination with aerosol reanalysis 75 and found cloud glaciation to be differently susceptible to otherwise similar dust loads in the Southern than in the Northern Hemisphere, which they found to agree with other findings on hemispheric differences in the mineralogical composition and related freezing efficiency of dust.

In the Southern Hemisphere mid-latitudes, ground-based lidar was first used by Kanitz et al. (2011) to assess the thermodynamic phase of stratiform mixed-phase clouds observed over Punta Arenas, Chile. They found 50% of clouds glaciated 80 at  $-30^{\circ}\text{C}$ , compared to the same glaciation occurring already at  $-13^{\circ}\text{C}$  in the Northern Hemisphere mid-latitudes (Seifert et al., 2010). Alexander and Protat (2018) corroborated these results in a similar study performed with lidar data from Kenaoon/Cape Grim. Radenz et al. (2021a) performed a contrasting study using a longer-term dataset (than Kanitz et al., 2011) again from clean and pristine Punta Arenas but also including Doppler wind lidar and Doppler cloud radar, from dust-laden Eastern Mediterranean (Limassol, Cyprus), and from polluted northern mid-latitudes (Leipzig, Germany). They found ice formation efficiency for clouds observed over Punta Arenas most strongly suppressed compared to Leipzig and Limassol for 85 clouds decoupled from the surface aerosol reservoir. Therefore, Radenz et al. (2021a) emphasize, besides the impact of gravity waves, the importance of quantifying terrestrial INP sources in the Southern Ocean. These terrestrial emissions need to be quantified by observations of free tropospheric aerosol up- and downwind of major landmasses in order to identify regions where cloud microphysics are most strongly impacted by these INP (Radenz et al., 2021a).

90 This is strong motivation to extend such investigations of aerosol effects on mixed-phase clouds to New Zealand/Aotearoa. There, besides clean marine conditions, episodic aerosol transport from Australia (wildfire smoke, desert dust, urban haze) is



occurring (Liley et al., 2001; Jones et al., 2001; Liley and Forgan, 2009). This enables a unique contrasting study at a single location which would not be possible in the permanently polluted northern hemisphere mid-latitudes nor in the permanently clean environment (of the free troposphere) of e.g., Punta Arenas. To investigate the efficiency of heterogeneous ice formation  
95 in natural clouds, this study makes use of a dataset which is unparalleled in the Southern Hemisphere consisting of long-term ground-based polarization lidar measurements on the South Island of New Zealand/Te Waipounamu.

The paper is structured as follows: In Sect. 2, the used data and methods are introduced. In Sect. 3, first, a measurement example is described as a case study (Sect. 3.1). Later, general air mass statistics based on trajectory and aerosol model re-analysis are provided (Sect. 3.2) The retrieved cloud statistics is then presented in Sect. 3.3. In Sect. 3.4, the separation of clouds based on  
100 the air mass statistics is presented. Finally, in Sect. 4, the findings are summarized and an outlook is provided.

## 2 Data and methods

### 2.1 Lauder lidar system

Since 1992, lidar observations ~~are~~ have been conducted by the National Institute of Water & Atmospheric Research (NIWA) at the Lauder Atmospheric Research Station on the South Island of New Zealand/Te Waipounamu, in collaboration with the  
105 and the Meteorological Research Institute of the Japan Meteorological Agency (MRI/JMA) (Uchino et al., 1995). In February 2009, the lidar system was upgraded with polarization capability (Nagai et al., 2010). After this upgrade, lidar observations are conducted by NIWA in collaboration with the National Institute for Environmental Studies (NIES) in Japan and MRI/JMA. The detailed specifications of the zenith-pointing dual-wavelength (1064, 532 nm) polarization lidar system are described in Nakamae et al. (2014) and Sakai et al. (2016). It uses a Nd:YAG (neodymium-doped yttrium aluminum garnet) laser with a  
110 pulse energy of 150 mJ, a pulse width of 5 ns, and a repetition rate of 10 Hz. The telescope diameter is 30.5 cm and the range resolution is 7.5 m. The field of view is 1 mrad and the beam divergence is 0.2 mrad. The signal at 1064 nm wavelength is detected with an analogue-mode avalanche photodiode, and two polarization components of the signals at 532 nm wavelength are detected with three photomultiplier tubes. This allows the retrieval of the particle backscatter coefficient at 532 nm and 1064 nm wavelength using the Klett–Fernald–Sasano algorithm (Klett, 1981, 1985; Fernald, 1984; Sasano et al., 1985), as well  
115 as the particle depolarization ratio at 532 nm wavelength. The Lauder Atmospheric Research Station is located at 370 m a.s.l., 45.037° S, 169.683° E. For this study, an 11-year polarization-lidar dataset from 15 March 2009 to 5 April 2020, particularly the ~~polarization and backscatter~~ co- and cross-polarized signals at 532 nm wavelength, was used.

### 2.2 Identification of cloud layers and their phase

The cloud layers observed by polarization-lidar were classified as either ice-containing or pure liquid. The used methodology  
120 was previously applied by Ansmann et al. (2009); Seifert et al. (2010, 2011, 2015); Kanitz et al. (2011), and is therefore only briefly outlined here. A cloud is defined as individual when it is separated from another cloud by more than 5 min in time and 500 m vertically in space. If the distance in space and time is smaller, the cloud layers are counted as only one. The cloud

boundaries (start and end time, cloud base and top height) are determined by visual inspection of the range-corrected lidar signal with aid of the volume depolarization ratio. Since the lidar signal might be already attenuated at the apparent cloud top, a quality flag ("well-defined cloud top") is introduced based on the signal strength above the visually defined cloud top where the signal-to-noise ratio must at least be 3% larger than the background noise level. Next, the volume depolarization ratio profile of each cloud layer is examined to identify ice-containing cloud layers. Irregularly shaped ice crystals depolarize light due to internal reflections. Liquid cloud droplets are spherical and do not depolarize light as long as no multiple scattering (at multiple droplets) occurs (Jimenez et al., 2020). ~~A highly accurate determination of the volume linear depolarization ratio is not necessary for this study. A clear discrimination of liquid water droplet depolarization (typically <0.2, including multiple scattering effects) and ice crystal depolarization (usually >0.4) is sufficient (Ansmann et al., 2009).~~ Specular reflection by aligned falling ice crystals can occur due to the zenith-pointing laser beam (Platt, 1978). This can lead to volume depolarization ratios close to zero which are not anymore distinguishable from depolarization ratios resulting from backscattering by spherical liquid droplets. ~~By considering these aggravating effects (multiple scattering, specular reflection), the depolarization ratio values at the very cloud base need to be considered when classifying cloud phase based on depolarization ratio~~ These aggravating effects (multiple scattering, specular reflection) need to be kept in mind during cloud phase determination with polarization lidar. Therefore, the depolarization ratio values at the very cloud base need to be considered when classifying cloud phase based on depolarization ratio (Seifert et al., 2010; Westbrook et al., 2010; Uchino et al., 1988). Another clear indication of an ice-containing cloud are ice virgae which can be unambiguously identified by ground-based lidar (Kanitz et al., 2011). The efficiency of heterogeneous ice nucleation is mainly controlled by temperature (DeMott et al., 2015). Therefore, the coldest part of a cloud (i.e., the cloud top) offers most favourable conditions for the start of heterogeneous ice formation (Raubert and Tokay, 1991; Lebo et al., 2008). We thus associate the cloud-top temperature to each of the observed cloud events. In a last step, each categorized cloud gets a cloud-top temperature assigned obtained from profiles from the GDAS (Global Data Assimilation System) with 1° spatial and 3 h temporal resolution from the National Weather Service's National Centers for Environmental Prediction (NCEP) at the coordinates 45° S, 169° E (GDAS, 2023).

### 2.3 Auxiliary tools

The Copernicus Atmospheric Monitoring Service - Monitoring Atmospheric Composition and Climate (CAMS-MACC, Morcrette et al., 2009; Inness et al., 2019) model aerosol re-analyses were used to obtain simulated aerosol conditions for each classified cloud. 3-hourly resolved mass mixing ratios of sea salt aerosol in three particle size ranges (0.03–0.5 µm, 0.5–5 µm, and 5–20 µm radius), mineral dust aerosol in three particle size ranges (0.03–0.55 µm, 0.55–0.9 µm, and 0.9–20 µm radius), hydrophilic and hydrophobic organic matter aerosol, hydrophilic and hydrophobic black carbon aerosol, and sulphate aerosol, as well as air temperature on a 3×3×12 grid were used (3 longitude (44.5°, 45.25°, 46° S), 3 latitude (168.5°, 169.25°, 170° E), 12 pressure levels (250–1000 hPa), generated using Copernicus Atmosphere Monitoring Service Information, 2023). From that grid, each cloud was assigned the corresponding aerosol information (mixing ratios) by trilinear interpolation to the cloud start time and cloud-top height above Lauder. Interpolation was carried out in the pressure space. Later, heights were calcu-

lated using the barometric formula based on the US Standard Atmosphere (standard temperature 288.15 K, standard pressure 1013.25 hPa, and a temperature gradient of 0.65 K per 100 m, U.S. Government Printing Office, 1976).

The HYSPLIT model (Hybrid Single Particle Lagrangian Integrated Trajectory Model, Stein et al., 2015; Rolph et al., 2017; HYSPLIT, 2023) was run to calculate backward trajectories for the presented example case and the clustering analysis which is shown in Sect 3.4. The HYSPLIT backward trajectories were calculated with a starting time at each cloud's starting time rounded to a full hour. The arrival heights above the measurement site were set to the cloud middle heights. After clustering of the backward trajectories using the standard HYSPLIT (2023) clustering tool, each cloud was assigned to its corresponding cluster.

The temporally and vertically resolved air mass source attribution tool TRACE (Radenz et al., 2021b) allows the retrieval of normed residence times of trajectories within defined height ranges (e.g., the planetary boundary layer or its proxies; the so called reception height) over certain surface cover classifications, named geographical areas, and latitude bands. The residence times at each time and height step are summed for each of these classes, where the air parcel was below the reception height. The residence time is an indication for the aerosol characteristics of the particular air parcel. TRACE was run with a temporal resolution of 3 h and the standard reception height of 2 km a.g.l. for the period March 2009 – April 2020 based on HYSPLIT backward trajectories. The following surface cover classifications "Water", "Forest", "Savanna/shrubland", "Grass/cropland", "Urban", "Snow/ice", and "Barren", and latitude bands " $< -60^\circ$ ", " $-60^\circ$ – $-30^\circ$ ", " $-30^\circ$ – $0^\circ$ ", " $0^\circ$ – $30^\circ$ ", " $30^\circ$ – $60^\circ$ ", and " $>60^\circ$ ", and named geographical areas "South America", "Africa", "Australia", "New Zealand", and "Antarctica/Southern Ocean" (equal to the latitude band " $< -60^\circ$ ") are defined in the TRACE tool (Radenz et al., 2021b). The TRACE normed residence times were linked with the cloud dataset using a nearest neighbour approach (i.e., closest in time and height to the cloud start times and cloud-top heights).

### 3 Results

#### 3.1 Case study

An example measurement of clouds above Lauder on 19–20 January 2020 UTC is shown in Fig. 1. The temporal developments of the uncalibrated attenuated backscatter coefficient (Fig. 1a) and the particle depolarization ratio (Fig. 1b) at 532 nm show a scene of ice-containing and liquid clouds between roughly 5–9 km height. Up to 3 km height, slightly depolarizing aerosol and at 3.5 km height a lofted aerosol layer were present. Above 9 km height, cirrus clouds were observed. This measurement falls into the period when above Lauder, elevated smoke layers from the extreme Australian bush fires 2019/20 (Ohneiser et al., 2020; Bègue et al., 2023) were frequently detected ~~at heights up to above 14 km~~. Below 2 km height, some liquid clouds with cloud-top temperatures above  $0^\circ\text{C}$  were measured. Furthermore, low clouds/fog impaired the lidar measurements for a short period on 19 January 2020. During this scene, 9 ice-containing clouds (indicated with magenta rectangles) and 7 liquid clouds (green rectangles, Fig. 1a,b) were classified.

Figure 1c shows vertical profiles of particle backscatter coefficient at 532 nm wavelength (Fig. 1ci) and INP concentration of marine and continental aerosol (Fig. 1cii). The profile was evaluated for a period without lower level clouds (20 January 2020,

04:30–04:40 UTC). The INP concentration was estimated from the backscatter coefficient using the method and conversion  
190 parameters described in Mamouri and Ansmann (2016) and the freezing parameterizations for continental (DeMott et al., 2010)  
and marine aerosol (McCluskey et al., 2018b) which were applied for the temperature range from  $-40^{\circ}\text{C}$  to  $0^{\circ}\text{C}$  as in Mamouri  
and Ansmann (2016). For the liquid cloud on 20 January 2020, 04:43–05:01 UTC with a cloud top at 7.7 km and a cloud-top  
temperature at  $-24^{\circ}\text{C}$ , this calculation yields INP concentrations at cloud top of  $0.3\text{ L}^{-1}$  (continental aerosol) and  $2\cdot 10^{-3}\text{ L}^{-1}$   
(marine aerosol). For the ice-containing cloud on 20 January 2020, 05:14–12:01 UTC with a cloud top at 8.9 km and a cloud-  
195 top temperature of  $-34^{\circ}\text{C}$ , where freezing is occurring probably regardless of the specific aerosol population, this yields INP  
concentrations at cloud top of  $1.5\text{ L}^{-1}$  (continental) and  $0.2\text{ L}^{-1}$  (marine). In general, the INP concentration estimates for  
continental (and respectively, marine) aerosol range from  $2\cdot 10^{-3}\text{ L}^{-1}$  ( $4\cdot 10^{-7}\text{ L}^{-1}$ ) at  $-10^{\circ}\text{C}$ , and  $0.06\text{ L}^{-1}$  ( $1\cdot 10^{-4}\text{ L}^{-1}$ ) at  
 $-20^{\circ}\text{C}$ , and  $0.9\text{ L}^{-1}$  ( $0.04\text{ L}^{-1}$ ) at  $-30^{\circ}\text{C}$ , to  $5\text{ L}^{-1}$  at  $-40^{\circ}\text{C}$ , respectively. These differences of up to 4 orders magnitudes  
emphasize the strong impact continental aerosol contribution has on INP concentrations and the potential resulting changes in  
200 freezing efficiency. For comparison, Radenz et al. (2021a) reported lidar-derived INP concentrations for Punta Arenas of about  
 $3\cdot 10^{-5}\text{ L}^{-1}$  ( $7\cdot 10^{-3}\text{ L}^{-1}$ ) at  $-20^{\circ}\text{C}$  ( $-30^{\circ}\text{C}$ ) when only pristine marine aerosol is present, while already small quantities  
(1–4%) of continental aerosol lead to a significant increase of the INP concentrations to about  $0.06\text{ L}^{-1}$  ( $0.06\text{ L}^{-1}$ ) at  $-20^{\circ}\text{C}$   
( $-30^{\circ}\text{C}$ ).

HYSPLIT backward trajectories for 120 h arriving above Lauder at 3, 5, and 7 km height at 19 January 2020, 15:00 UTC  
205 are shown in Fig. 1d. While the lower backward trajectory, probably representative for the near ground as well as the lofted  
aerosol layer, points towards rather local or regional air mass origin, the upper backward trajectories come from Australia or  
its direction. Therefore, this measurement example (i.e., the ice-containing cloud on 19 January 2020, 15:59–18:51 UTC, also  
indicated with one of the magenta rectangles in Figs. 1a,b) belongs to the Australian backward trajectory cluster 1 (Fig. 9a)  
exhibiting higher ice formation efficiency (Sect. 3.4, Fig. 9b). At lower levels, the air masses were transported slowly due to a  
210 weak-gradient high-pressure situation and only in the upper half of the troposphere ( $>6\text{ km}$  height), a faster flow regime from  
Australia prevailed (NIWA, 2023).

Figure 2 shows vertical profiles of TRACE surface type and named geographical area classifications, MACC aerosol mixing  
ratios excluding sea salt, and temperature and relative humidity from GDAS temporally closest (19 January 2020, 15:00 UTC)  
to the above mentioned ice-containing cloud. The TRACE surface type classifications indicate air masses influenced by "Water"  
215 and "Grass/cropland" in the lower altitudes and by "Savanna/shrubland" (besides "Water") in the higher altitudes (Fig. 2a). The  
TRACE named geographical area classifications (Fig. 2b) indicate air masses influenced by "Australia" above 5.5 km height  
and "New Zealand" and "Antarctica/Southern Ocean" up to about 2–2.5 km. Although the backward trajectory arriving at 7 km  
height of the single HYSPLIT run in Fig. 1d is staying exclusively in the free troposphere, the statistical results of TRACE  
(having a reception height of 2 km a.g.l.) clearly indicate a continental contribution at these heights (Fig. 2a,b). The MACC  
220 aerosol mixing ratios (excluding sea salt) are dominated by organic matter and sulphate which are decreasing above 5.5 km,  
while dust and black carbon are marginal throughout the column (Fig. 2c). According to the GDAS profile, the temperature at  
7 km is about  $-20^{\circ}\text{C}$  at high relative humidity (Fig. 2d).

### 3.2 Air mass statistics

Before the presentation of the mixed-phase cloud statistics, general information on the conditions for heterogeneous freezing and the aerosol properties are provided in this section. Long-term records of radiosoundings at Invercargill Airport about 200 km southwest of Lauder were used to assess the abundance of thermodynamic conditions under which heterogeneous freezing occurs, namely temperatures between 0 and  $-35^{\circ}\text{C}$  and the availability of moisture. Given the short distance to Lauder, we assume that the conditions are comparable to those from Invercargill, for which the valuable radiosonde dataset is available. Tradowsky et al. (2018) compared radiosonde and automatic weather station data collected at Lauder and Invercargill and concluded that especially temperature anomalies are well correlated between these two sites. Figure 3 shows the seasonal occurrence of that heterogeneous freezing regime over Invercargill. The heights of the isotherms show a maximum in the summer season (austral, DJF) with 2.6 km for the  $0^{\circ}\text{C}$  and 8.4 km for the  $-35^{\circ}\text{C}$  isotherm (Fig. 3a). In austral autumn (MAM), their heights are only slightly lower while in winter, their heights decrease to 7 km for the  $-35^{\circ}\text{C}$  isotherm and to 1.4 km for the  $0^{\circ}\text{C}$  isotherm. During spring (SON) the isotherms remain at lower heights than in autumn. Large-scale dew point spreads less than 2 K are usually needed for clouds to form (Poore et al., 1995). Depending on the vertical air motions, dew point spreads up to 6 K could be sufficient as well. Figure 3b shows the relative frequency of dew point spreads between 0–2 K and between 2–6 K, respectively, for heights with temperatures in the heterogeneous freezing regime. The frequencies of the 0–2 K dew point spreads during summer and autumn are nearly equal with 14% and the maximum occurs in winter with a frequency of 17% being only slightly higher than the one in spring. Therefore, suitable conditions for clouds to form in the heterogeneous freezing regime are present throughout the year at Invercargill. Climatologically, one can assume similar conditions for the site of Lauder, which is just 200 km north of the radiosonde station in Invercargill. However, due to the vicinity of Lauder to the mountains and associated lee effects, the free troposphere over Lauder might contain less water vapor. Therefore, the average dew point spread might be lower than over Invercargill. In turn, the likelihood of strong upward motion due to orographic mountain waves might be pronounced over Lauder, which would favor the formation of free-tropospheric cloud layers.

The general aerosol conditions above Lauder were derived based on the MACC dataset. The MACC mixing ratios of the three size ranges of sea salt and dust aerosol species and the species of organic matter and black carbon were summed up and averaged individually on a 28 d time window over the measurement period from January 2009 to April 2020. Figure 4 shows a time series of these 28 d means of the MACC aerosol mixing ratios at the 500 hPa level above Lauder. Obviously, the simulated aerosol mixing ratios are dominated by sea salt which shows weakly pronounced minima during (austral) summer and maxima during (austral) spring. Figure 5 shows the same data at the same pressure level but excluding the dominant sea salt mixing ratio. In strong contrast to the total aerosol mixing ratios, the remaining aerosol mixing ratios show a distinct annual cycle with maxima during (austral) spring or summer. The most abundant species are organic matter followed by dust and sulphate and marginal amounts of black carbon. The simulated aerosol mixing ratios reach exceptionally high values in austral summer 2019/2020 due to the Australian bush fires at that time. Based on long-term sun photometer observations, Liley and Forgan (2009) showed that the median aerosol optical thickness (AOT) above Lauder is about 0.03 at 500 nm wavelength with a

minimum during austral winter (0.02) and a maximum during austral spring and summer (0.04). They also report no significant variation of AOT with surface humidity below 90%. The peak in AOT in spring has been attributed to long-range transport of biomass burning products, as implied by the correlation with carbon monoxide measurements presented by Liley et al. (2001) and Jones et al. (2001). With regard to the usage of the MACC mixing ratios as an indication of aerosol composition and abundance for the analysis of aerosol impact on the formation of mixed phase clouds, this dominance of sea salt could be obstructive and as the annual cycle in Fig. 4 shows, large amounts of sea salt might rather be a tracer of air containing less other aerosol. Therefore, sea salt is omitted in the subsequent analyses and discussions.

Results of the temporally and vertically resolved air mass source attribution tool TRACE for trajectories arriving above Lauder are shown in Fig. 6. The height-profiles of normed residence times of trajectories above named geographical area classifications indicate "New Zealand" and "Antarctica/Southern Ocean" as the most important air mass sources up to heights of about 2 km (Fig. 6a). Above that, "Australia" is the major source of air masses while "Africa" and "South America" show an order of magnitude lower normed residence times. The temperature profiles of named geographical area classifications indicate "New Zealand" as the major source up to shortly above 0°C, at lower temperatures "Antarctica/Southern Ocean" and again "Australia" become more important (Fig. 6b). Regarding the height profiles of normed residence times of trajectories above surface cover classifications, "Water" is dominant over the whole column followed by "Savanna/shrubland" except in the lowest 1–2 km where the other categories except "Barren" show slightly higher normed residence times (Fig. 6c). In terms of temperature profiles of surface cover classifications, a very similar picture as in the height profiles is drawn apart from relatively larger residence times above "Snow/ice" at about  $-15^{\circ}\text{C}$  to  $0^{\circ}\text{C}$  (Fig. 6d). It can be concluded that Lauder is seeing air masses influenced by New Zealand/Aotearoa and Australia, mainly at heights (temperatures) above (below) 2 km ( $-5^{\circ}\text{C}$ ), as well as air masses of marine or Southern Ocean origin.

### 3.3 Cloud statistics

In total, the 11-year dataset covers more than 9000 h of polarization-lidar measurement data. Figure 7 shows all classified cloud layers from 2009 to 2020. As can be seen from the increased number of classified clouds, three periods in 2011, 2015, and from end of 2019 until 2020 experienced more frequent lidar observations. These were conducted to characterize the plumes of the erupted Chilean volcanoes Puyehue-Cordón Caulle (2011) and Calbuco (2015), and to obtain a larger data basis specifically for this study (2019/20). A total of 3360 clouds were identified with a total occurrence time of more than 6000 h, 1576 out of it in the temperature range between  $-40^{\circ}\text{C}$  and  $0^{\circ}\text{C}$ . The number of clouds (total, well-defined, in the range of  $-40^{\circ}\text{C}$  to  $0^{\circ}\text{C}$ , respectively) as well as the relative time covered by the occurrence time of the identified clouds for each year is listed in Tab. 1. Over all, about 45% of the observed clouds (1497) did not have a well-defined cloud-top due to too large cloud optical thickness. The remaining 1863 clouds were classified as well-defined (WD). In the cloud-top temperature range of  $-40^{\circ}\text{C}$  to  $0^{\circ}\text{C}$ , 61% of clouds (973) have a well-defined cloud-top. The fraction of ice-containing clouds at a specific cloud-top temperature can be considered characteristic for a certain geographical region and is widely used to describe ice nucleation in models or observations (e.g., Seifert et al., 2015; McCoy et al., 2015; Alexander and Protat, 2018; Villanueva et al., 2021; Radenz et al., 2021a). Figure 8 shows the fraction of ice-containing clouds in eight cloud-top temperature intervals of 5 K from

−40°C to 0°C for Lauder (this study), Leipzig (Seifert et al., 2010), and Punta Arenas (Kanitz et al., 2011). The error bars denote the statistical uncertainty by the standard error  $\sigma$  defined by the following formula

$$\sigma = \sqrt{f(1-f)/n} \quad (1)$$

with  $f$  as the frequency of occurrence of ice-containing clouds and  $n$  as the total number of observed clouds in the specific  
295 temperature range. The fraction of ice-containing clouds including clouds without well-defined cloud-tops is slightly larger at  
most cloud-top temperature ranges and is shown too (Fig. 8, dashed line). Leipzig (51.4° N, 12.4° E) represents typical polluted  
aerosol conditions of the northern mid-latitudes (Seifert et al., 2010; Kanitz et al., 2011) while Punta Arenas (53.1° S, 70.9° W,  
southern Chile) represents clean and pristine southern mid-latitudes (Jimenez et al., 2020; Radenz et al., 2021a). For Lauder,  
an increase of the relative number of ice-containing clouds is observed at about a temperature range of −20°C to −15°C. In  
300 this temperature range, the fraction of ice-containing clouds at Lauder is about a factor of 5.4 smaller than at Leipzig and close  
to that at Punta Arenas. On the other hand, in the temperature range range of −30°C to −25°C, the fraction of ice-containing  
clouds at Lauder is 1.3 times smaller than at Leipzig and still 1.6 times larger than at Punta Arenas. Lauder and Punta Arenas  
are subject to generally low free-tropospheric aerosol loads, which suggests that the lower ice formation efficiency at these two  
sites compared to Leipzig is related to low INP concentrations.

### 305 3.4 Separation of clouds based on air mass statistics

Backward trajectory tools were used to investigate the aerosol effect on ice formation efficiency in clouds above Lauder. In  
a first approach, backward trajectories for each classified **well-defined** cloud were calculated and clustered (see Sect. 2.3).  
The resulting clusters are shown in Fig. 9a. Cluster 1 (35% of trajectories) can be described as direct Australian transport.  
Contrasting to this, cluster 2 (26% of trajectories) represents trajectories with fast transport of Antarctic air masses. Clusters 3  
310 (18%) and 4 (21% of trajectories) contain trajectories of air masses transported above ocean and therefore, can be characterized  
as marine. Figure 9b shows the fraction of ice-containing clouds against cloud-top temperature for all **well-defined** clouds and  
for **well-defined** clouds corresponding to the trajectories in the above mentioned clusters (Fig. 9a). The fast-Antarctic transport  
cluster 2 shows much lower ice formation efficiency. While the Australian cluster 1 shows highest ice formation efficiency  
except at the temperature ranges −25°C to −20°C. There, the marine clusters 3 and 4 exhibit larger ice formation efficiency,  
315 albeit within statistical uncertainty.

The MACC model was used to obtain simulated aerosol conditions for each classified **well-defined** cloud (see Sect. 2.3).  
The aerosol effect on ice formation efficiency in the observed clouds is investigated by categorizing these clouds based on  
~~varying arbitrary thresholds of~~ the simulated aerosol mixing ratios. As discussed in Sect. 3.2, the dominance of sea salt in  
the simulated aerosol mixing ratios above Lauder might obstruct the assessment of aerosol impact on the formation of mixed  
320 phase clouds. Therefore, two different quantities were defined based on the MACC aerosol mixing ratios to use as a proxy for  
aerosol abundance. The first one is the MACC total aerosol mixing ratio excluding the sea salt mixing ratio (see the time series  
in Fig. 5). The second one is the former divided by the sea salt mixing ratio, i.e., the MACC aerosol mixing ratio excluding sea  
salt relative to sea salt. Varying arbitrary thresholds on these two quantities were then used to categorize the above mentioned



clouds. Figure 10 shows the fraction of ice-containing clouds against cloud-top temperature for all well-defined clouds and  
325 for well-defined clouds corresponding to increasing MACC total aerosol mixing ratios excluding sea salt as well as increasing  
MACC aerosol mixing ratios excluding sea salt relative to sea salt. Enhanced ice formation efficiencies are found for clouds  
experiencing a combination of high aerosol mixing ratios (excluding sea salt) and a low sea salt fraction. This is indication for  
higher ice formation efficiency for clouds which are more strongly influenced by continental aerosol.

#### 4 Summary, Conclusion, and outlook

330 This study investigated the impact of variations in the atmospheric aerosol load on the frequency of heterogeneous ice formation  
over Lauder, NZ New Zealand/Aotearoa. As prerequisites, long-term datasets of polarization lidar observations, of atmospheric  
temperature and humidity profiles from both, radiosondes and model re-analyses, of HYSPLIT backward trajectories, as well as  
of CAMS-MACC aerosol re-analysis data were acquired and processed. An 11-year polarization lidar dataset from Lauder was  
analyzed with the Seifert et al. (2010, 2015) methods to assess the ice-formation efficiency in clouds with top temperatures in  
335 the heterogeneous freezing range from  $-40^{\circ}\text{C}$  to  $0^{\circ}\text{C}$ . Thereby, the cloud dataset considered only clouds with a lidar-detectable  
cloud top height, in order to prevent positive temperature biases by deep, attenuating clouds with underestimated cloud tops.  
Based on a long-term radiosonde dataset from Invercargill, NZ New Zealand/Aotearoa, the general conditions for the formation  
of mixed-phase clouds in the region of South New Zealand/Aotearoa were characterized. It was found that the  $-35^{\circ}\text{C}$  isotherm  
lies between 7 km (austral winter) and 8.4 km (austral summer). In the heterogeneous freezing temperature range, dew point  
340 spreads of 0–2 K occurred with a frequency of 14% (austral summer) and 17% (austral winter).

Next, the general aerosol conditions over Lauder NZ were assessed based on a statistical analysis of HYSPLIT back trajectories  
with the TRACE tool, as well as based on a long-term statistics of CAMS-MACC aerosol re-analyses data. Generally, it was  
found that sea salt and marine air masses are the dominating aerosol species. Nevertheless, this constant marine background was  
super-imposed by aerosol of considerable variability regarding the air mass source regions and the aerosol load. Both, clean,  
345 pristine air masses from Antarctica and the Southern Ocean, as well as aerosol-laden air masses from continental Australia  
occur frequently over New Zealand/Aotearoa. The number of identified cases per air mass was sufficient to split the lidar-based  
cloud dataset into different sub-populations in order to assess the impact of air mass origin on the frequency of heterogeneous  
ice formation.

Overall, ice-formation efficiency in clouds above Lauder was found to be lower than at Leipzig in the polluted mid-latitudes  
350 of the northern hemisphere, but higher than in very clean and pristine environments, such as Punta Arenas in Southern Chile,  
8000 km downwind of any neighbouring landmass. This can be expected as New Zealand/Aotearoa is influenced both by  
Australian and marine aerosol. Further, the incorporation of the trajectory tools and aerosol model simulations both point  
clearly to higher ice formation efficiency for clouds which are more strongly influenced by continental aerosol, and to lower  
ice formation efficiency for clouds which are more influenced by Antarctic/marine aerosol and air masses.

355 In conclusion, it can be stated based on the outcome of the study, that the atmospheric conditions over the South Island of New  
Zealand/Te Waipounamu support contrast studies for evaluation of the relationship between aerosol load and mixed-phase

cloud formation. We argue that this region is one of the easiest accessible places in the Southern Hemisphere mid-latitudes, where local aerosol sources are scarce while the general circulation permits alternating periods of pristine and aerosol-laden air masses, respectively.

360 Our study made use of a unique 11-year polarization lidar dataset from Lauder. Other active remote sensing instrumentation was not available for such a long time period over this region. There is hence a high potential for future long-term experiments that incorporate additional observational capabilities, specifically of Raman and Doppler lidar as well as cloud Doppler radar. Radenz et al. (2021b) have extensively demonstrated the capabilities of these additional instruments in characterizing (i) the ice nucleating capabilities of the aerosol mix at cloud level, (ii) the impact of atmospheric gravity waves on the sustained  
365 formation of supercooled liquid water, and (iii) the determination of aerosol impacts on ice water mass production as estimated from cloud radar observations. Moreover, cloud radar would allow to observe the cloud layers in their full extent, which would minimize the number of clouds with undefined cloud top heights/temperatures.

Future studies might also make further use of other atmospheric measurements from the Lauder observatory. Profiles of trace gas concentration could be used as indicators for Southern Ocean and marine air masses. From February 2023, the aerosol  
370 lidar at Lauder has been automated for 24-hour operation, in alternating 10-minute intervals. This will greatly increase the data available for possible extension or refinement of this study.

*Author contributions.* JH analyzed the data and drafted the manuscript. JBL conducted the lidar measurements in collaboration with the NIWA Lauder team, OU, IM, TS, and TN, and made these data available. PS provided data analysis software and transferred the lidar data in  
375 compatible format. MR provided radiosonde data and TRACE air mass source analysis results. PS and AA supervised the work and revised the manuscript. All authors jointly contributed to the paper and the scientific discussion.

*Financial support.* The LOSTECCA (Lidar Observations of SpatioTemporal Contrasts in Clouds and Aerosols in Lauder, New Zealand /Aotearoa) project is funded by the Federal Ministry of Education and Research of Germany in the context of strategic projects between  
380 Germany and New Zealand/Aotearoa under the funding code 01DR20002. This project received support by the European Research Infrastructure for the observations of Aerosol, Clouds, and Trace Gases Research Infrastructure (ACTRIS) under grant agreement no. 654109 and 739530 from the European Unions Horizon 2020 research and innovation program. Additionally, this project is part of ACTRIS-D, which is funded by the Federal Ministry of Education and Research of Germany under the funding code 01LK2001A. Deep South Challenge and NIWA received funding through the Strategic Science Investment Fund (SSIF) of New Zealand/Aotearoa. The lidar measurements at Lauder  
385 are supported in part by the funding of the Greenhouse Gases Observing Satellite (GOSAT) series project.

*Code and data availability.* HYSPLIT backward trajectories are calculated via the available online tools (<https://www.ready.noaa.gov/HYSPLIT.php>, last access: 21 September 2023, Stein et al., 2015; Rolph et al., 2017; HYSPLIT, 2023). GDAS data is available at <https://www.ready.noaa.gov/gdas1.php> (GDAS, 2023), last access: 21 September 2023. The air mass source attribution tool TRACE is available  
390 at [https://github.com/martin-rdz/trace\\_airmass\\_source](https://github.com/martin-rdz/trace_airmass_source), last access: 21 September 2023 (Radenz et al., 2021b). The Invercargill radiosonde data was obtained through the Integrated Global Radiosonde Archive (IGRA) dataset (<https://www.ncei.noaa.gov/products/weather-balloon/integrated-global-radiosonde-archive>, last access: 21 September 2023, Durre et al., 2006, 2018). The TRACE results, the cloud data set, the

used analysis software, and the lidar data are available on request at TROPOS or NIWA.

395 *Acknowledgements.* We thank Kevin Ohneiser for providing the CAMS-MACC data.

*Competing interests.* All authors declare no competing interests.

## References

- 400 Alexander, S. P. and Protat, A.: Cloud Properties Observed From the Surface and by Satellite at the Northern Edge of the Southern Ocean, *J. Geophys. Res. Atmos.*, 123, 443–456, <https://doi.org/10.1002/2017JD026552>, 2018.
- Ansmann, A., Tesche, M., Seifert, P., Althausen, D., Engelmann, R., Fruntke, J., Wandinger, U., Mattis, I., and Müller, D.: Evolution of the ice phase in tropical altocumulus: SAMUM lidar observations over Cape Verde, *J. Geophys. Res. Atmos.*, 114, D17 208, <https://doi.org/10.1029/2008JD011659>, 2009.
- 405 Bègue, N., Baron, A., Krysztofciak, G., Berthet, G., Bencherif, H., Kloss, C., Jégou, F., Khaykin, S., Ranaivombola, M., Millet, T., Portafaix, T., Duflo, V., Keckhut, P., Vèrèmes, H., Payen, G., Sha, M. K., Coheur, P.-F., Clerbaux, C., Sicard, M., Sakai, T., Querel, R., Liley, B., Smale, D., Morino, I., Ochino, O., Nagai, T., Smale, P., and Robinson, J.: Evidence of a dual African and Australian biomass burning influence on the vertical distribution of aerosol and carbon monoxide over the Southwest Indian Ocean basin in early 2020, *EGU sphere*, 2023, 1–45, <https://doi.org/10.5194/egusphere-2023-1946>, 2023.
- 410 Bodas-Salcedo, A., Williams, K. D., Ringer, M. A., Beau, I., Cole, J. N. S., Dufresne, J.-L., Koshiro, T., Stevens, B., Wang, Z., and Yokohata, T.: Origins of the Solar Radiation Biases over the Southern Ocean in CFMIP2 Models, *J. Clim.*, 27, 41–56, <https://doi.org/10.1175/JCLI-D-13-00169.1>, 2014.
- Bodas-Salcedo, A., Hill, P. G., Furtado, K., Williams, K. D., Field, P. R., Manners, J. C., Hyder, P., and Kato, S.: Large Contribution of Supercooled Liquid Clouds to the Solar Radiation Budget of the Southern Ocean, *J. Clim.*, 29, 4213–4228, <https://doi.org/10.1175/JCLI-D-15-0564.1>, 2016.
- 415 Bodas-Salcedo, A., Mulcahy, J. P., Andrews, T., Williams, K. D., Ringer, M. A., Field, P. R., and Elsaesser, G. S.: Strong Dependence of Atmospheric Feedbacks on Mixed-Phase Microphysics and Aerosol-Cloud Interactions in HadGEM3, *J. Adv. Model. Earth Syst.*, 11, 1735–1758, <https://doi.org/10.1029/2019MS001688>, 2019.
- Choi, Y.-S., Lindzen, R. S., Ho, C.-H., and Kim, J.: Space observations of cold-cloud phase change, *Proc. Natl. Acad. Sci.*, 107, 11 211–420 11 216, <https://doi.org/10.1073/pnas.1006241107>, 2010.
- Copernicus Atmosphere Monitoring Service Information(2023): Copernicus Atmosphere Monitoring Service Information: <https://atmosphere.copernicus.eu/>, last access: 21 September, 2023.
- DeMott, P. J., Prenni, A. J., Liu, X., Kreidenweis, S. M., Petters, M. D., Twohy, C. H., Richardson, M. S., Eidhammer, T., and Rogers, D. C.: Predicting global atmospheric ice nuclei distributions and their impacts on climate, *Proc. Natl. Acad. Sci.*, 107, 11 217–11 222, 425 <https://doi.org/10.1073/pnas.0910818107>, 2010.
- DeMott, P. J., Prenni, A. J., McMeeking, G. R., Sullivan, R. C., Petters, M. D., Tobo, Y., Niemand, M., Möhler, O., Snider, J. R., Wang, Z., and Kreidenweis, S. M.: Integrating laboratory and field data to quantify the immersion freezing ice nucleation activity of mineral dust particles, *Atmos. Chem. Phys.*, 15, 393–409, <https://doi.org/10.5194/acp-15-393-2015>, 2015.
- 430 DeMott, P. J., Hill, T. C. J., McCluskey, C. S., Prather, K. A., Collins, D. B., Sullivan, R. C., Ruppel, M. J., Mason, R. H., Irish, V. E., Lee, T., Hwang, C. Y., Rhee, T. S., Snider, J. R., McMeeking, G. R., Dhaniyala, S., Lewis, E. R., Wentzell, J. J. B., Abbatt, J., CLee, C., Sultana, C. M., Ault, A. P., Axson, J. L., Diaz Martinez, M., Venero, I., Santos-Figueroa, G., Stokes, M. D., Deane, G. B., Mayol-Bracero, O. L., Grassian, V. H., Bertram, T. H., Bertram, A. K., Moffett, B. F., and Franc, G. D.: Sea spray aerosol as a unique source of ice nucleating particles, *Proc. Natl. Acad. Sci.*, 113, 5797–5803, <https://doi.org/10.1073/pnas.1514034112>, 2016.
- 435 Desai, N., Chandrakar, K. K., Kinney, G., Cantrell, W., and Shaw, R. A.: Aerosol-Mediated Glaciation of Mixed-Phase Clouds: Steady-State Laboratory Measurements, *Geophys. Res. Lett.*, 46, 9154–9162, <https://doi.org/10.1029/2019GL083503>, 2019.

- Durre, I., Vose, R. S., and Wuertz, D. B.: Overview of the Integrated Global Radiosonde Archive, *J. Clim.*, 19, 53–68, <https://doi.org/10.1175/JCLI3594.1>, 2006.
- Durre, I., Yin, X., Vose, R. S., Applequist, S., and Arnfield, J.: Enhancing the Data Coverage in the Integrated Global Radiosonde Archive, *J. Atmos. Oceanic Technol.*, 35, 1753–1770, <https://doi.org/10.1175/JTECH-D-17-0223.1>, 2018.
- 440 Fernald, F. G.: Analysis of atmospheric lidar observations: some comments, *Appl. Opt.*, 23, 652–653, <https://doi.org/10.1364/AO.23.000652>, 1984.
- Franklin, C. N., Sun, Z., Bi, D., Dix, M., Yan, H., and Bodas-Salcedo, A.: Evaluation of clouds in ACCESS using the satellite simulator package COSP: Global, seasonal, and regional cloud properties, *J. Geophys. Res. Atmos.*, 118, 732–748, <https://doi.org/10.1029/2012JD018469>, 2013.
- 445 Gayet, J.-F., Ovarlez, J., Shcherbakov, V., Ström, J., Schumann, U., Minikin, A., Auriol, F., Petzold, A., and Monier, M.: Cirrus cloud microphysical and optical properties at southern and northern midlatitudes during the INCA experiment, *J. Geophys. Res. Atmos.*, 109, D20 206, <https://doi.org/10.1029/2004JD004803>, 2004.
- GDAS(2023): Global Data Assimilation System, meteorological data base, available at: <https://www.ready.noaa.gov/gdas1.php>, last access: 21 September, 2023.
- 450 Grise, K. M., Polvani, L. M., and Fasullo, J. T.: Reexamining the Relationship between Climate Sensitivity and the Southern Hemisphere Radiation Budget in CMIP Models, *J. Clim.*, 28, 9298–9312, <https://doi.org/10.1175/JCLI-D-15-0031.1>, 2015.
- Hamilton, D. S., Lee, L. A., Pringle, K. J., Reddington, C. L., Spracklen, D. V., and Carslaw, K. S.: Occurrence of pristine aerosol environments on a polluted planet, *Proc. Natl. Acad. Sci.*, 111, 18 466–18 471, <https://doi.org/10.1073/pnas.1415440111>, 2014.
- Hogan, R. J., Francis, P. N., Flentje, H. E., Illingworth, A., Quante, M., and Pelon, J.: Characteristics of mixed-phase clouds. I: Lidar, radar
- 455 and aircraft observations from CLARE’98, *Q. J. R. Meteorol. Soc.*, 129, <https://doi.org/12345>, 2003.
- Hu, Y., Rodier, S., Xu, K., Sun, W., Huang, J., Lin, B., Zhai, P., and Josset, D.: Occurrence, liquid water content, and fraction of supercooled water clouds from combined CALIOP/IIR/MODIS measurements, *J. Geophys. Res. Atmos.*, 115, D00H34, <https://doi.org/10.1029/2009JD012384>, 2010.
- Huang, Y., Protat, A., Siems, S. T., and Manton, M. J.: A-Train Observations of Maritime Midlatitude Storm-Track Cloud Systems: Comparing the Southern Ocean against the North Atlantic, *J. Clim.*, 28, 1920–1939, <https://doi.org/10.1175/JCLI-D-14-00169.1>, 2015.
- 460 Humphries, R. S., Keywood, M. D., Ward, J. P., Harnwell, J., Alexander, S. P., Klekociuk, A. R., Hara, K., McRobert, I. M., Protat, A., Alroe, J., Cravigan, L. T., Miljevic, B., Ristovski, Z. D., Schofield, R., Wilson, S. R., Flynn, C. J., Kulkarni, G. R., Mace, G. G., McFarquhar, G. M., Chambers, S. D., Williams, A. G., and Griffiths, A. D.: Measurement report: Understanding the seasonal cycle of Southern Ocean aerosols, *Atmos. Chem. Phys.*, 23, 3749–3777, <https://doi.org/10.5194/acp-23-3749-2023>, 2023.
- 465 Hyder, P., Edwards, J. M., Allan, R. P., Hewitt, H. T., Bracegirdle, T. J., Gregory, J. M., Wood, R. A., Meijers, A. J. S., Mulcahy, J., Field, P., Furtado, K., Bodas-Salcedo, A., Williams, K. D., Copsey, D., Josey, S. A., Liu, C., Roberts, C. D., Sanchez, C., Ridley, J., Thorpe, L., Hardiman, S. C., Mayer, M., Berry, D. I., and Belcher, S. E.: Critical Southern Ocean Climate Model Biases Traced to Atmospheric Model Cloud Errors, *Nat. Commun.*, 9, 3625, <https://doi.org/10.1038/s41467-018-05634-2>, 2018.
- HYSPLIT(2023): HYSPLIT: HYbrid Single-Particle Lagrangian Integrated Trajectory model, backward trajectory calculation tool, available
- 470 at: <https://www.ready.noaa.gov/HYSPLIT.php>, last access: 21 September, 2023.
- Inness, A., Ades, M., Agustí-Panareda, A., Barré, J., Benedictow, A., Blechschmidt, A.-M., Dominguez, J. J., Engelen, R., Eskes, H., Fleming, J., Huijnen, V., Jones, L., Kipling, Z., Massart, S., Parrington, M., Peuch, V.-H., Razinger, M., Remy, S., Schulz, M., and Suttie,

- M.: The CAMS reanalysis of atmospheric composition, *Atmos. Chem. Phys.*, 19, 3515–3556, <https://doi.org/10.5194/acp-19-3515-2019>, 2019.
- 475 Jimenez, C., Ansmann, A., Engelmann, R., Donovan, D., Malinka, A., Seifert, P., Wiesen, R., Radenz, M., Yin, Z., Bühl, J., Schmidt, J., Barja, B., and Wandinger, U.: The dual-field-of-view polarization lidar technique: a new concept in monitoring aerosol effects in liquid-water clouds – case studies, *Atmos. Chem. Phys.*, 20, 15 265–15 284, <https://doi.org/10.5194/acp-20-15265-2020>, 2020.
- Jones, N. B., Rinsland, C. P., Liley, J. B., and Rosen, J.: Correlation of aerosol and carbon monoxide at 45°S: Evidence of biomass burning emissions, *Geophys. Res. Lett.*, 28, 709–712, <https://doi.org/10.1029/2000GL012203>, 2001.
- 480 Kajtar, J. B., Santoso, A., Collins, M., Taschetto, A. S., England, M. H., and Frankcombe, L. M.: CMIP5 Intermodel Relationships in the Baseline Southern Ocean Climate System and With Future Projections, *Earth’s Future*, 9, e2020EF001873, <https://doi.org/10.1029/2020EF001873>, 2021.
- Kanitz, T., Seifert, P., Ansmann, A., Engelmann, R., Althausen, D., Casiccia, C., and Rohwer, E. G.: Contrasting the impact of aerosols at northern and southern midlatitudes on heterogeneous ice formation, *Geophys. Res. Lett.*, 38, L17 802, <https://doi.org/10.1029/2011GL048532>, 2011.
- 485 Klett, J. D.: Stable analytical inversion solution for processing lidar returns, *Appl. Opt.*, 20, 211–220, <https://doi.org/10.1364/AO.20.000211>, 1981.
- Klett, J. D.: Lidar inversion with variable backscatter/extinction ratios, *Appl. Opt.*, 24, 1638–1643, <https://doi.org/10.1364/AO.25.000833>, 1985.
- 490 Korolev, A., McFarquhar, G., Field, P. R., Franklin, C., Lawson, P., Wang, Z., Williams, E., Abel, S. J., Axisa, D., Borrmann, S., Crosier, J., Fugal, J., Krämer, M., Lohmann, U., Schenczek, O., Schnaiter, M., and Wendisch, M.: Mixed-Phase Clouds: Progress and Challenges, *Meteorol. Monogr.*, 58, 5.1–5.50, <https://doi.org/10.1175/AMSMONOGRAPHS-D-17-0001.1>, 2017.
- Kuma, P., Bender, F. A.-M., Schuddeboom, A., McDonald, A. J., and Seland, Ø.: Machine learning of cloud types in satellite observations and climate models, *Atmos. Chem. Phys.*, 23, 523–549, <https://doi.org/10.5194/acp-23-523-2023>, 2023.
- 495 Lebo, Z. J., Johnson, N. C., and Harrington, J. Y.: Radiative influences on ice crystal and droplet growth within mixed-phase stratus clouds, *J. Geophys. Res. Atmos.*, 113, D09 203, <https://doi.org/10.1029/2007JD009262>, 2008.
- Liley, J. B. and Forgan, B. W.: Aerosol optical depth over Lauder, New Zealand, *Geophys. Res. Lett.*, 36, L07 811, <https://doi.org/10.1029/2008GL037141>, 2009.
- Liley, J. B., Rosen, J. M., Kjome, N. T., Jones, N. B., and Rinsland, C. P.: Springtime enhancement of upper tropospheric aerosol at 45°S, *Geophys. Res. Lett.*, 28, 1495–1498, <https://doi.org/10.1029/2000GL012206>, 2001.
- 500 Lohmann, U. and Feichter, J.: Global indirect aerosol effects: a review, *Atmos. Chem. Phys.*, 5, 715–737, <https://doi.org/10.5194/acp-5-715-2005>, 2005.
- Mace, G. G., Protat, A., and Benson, S.: Mixed-Phase Clouds Over the Southern Ocean as Observed From Satellite and Surface Based Lidar and Radar, *J. Geophys. Res. Atmos.*, 126, e2021JD034 569, <https://doi.org/10.1029/2021JD034569>, 2021a.
- 505 Mace, G. G., Protat, A., Humphries, R. S., Alexander, S. P., McRobert, I. M., Ward, J., Selleck, P., Keywood, M., and McFarquhar, G. M.: Southern Ocean Cloud Properties Derived From CAPRICORN and MARCUS Data, *J. Geophys. Res. Atmos.*, 126, e2020JD033 368, <https://doi.org/10.1029/2020JD033368>, 2021b.
- Mallet, M. D., Humphries, R. S., Fiddes, S. L., Alexander, S. P., Altieri, K., Angot, H., Anilkumar, N., Bartels-Rausch, T., Creamean, J., Dall’Osto, M., Dommergue, A., Frey, M., Henning, S., Lannuzel, D., Lapere, R., Mace, G. G., Mahajan, A. S., McFarquhar, G. M.,   
 510 Meiners, K. M., Miljevic, B., Peeken, I., Protat, A., Schmale, J., Steiner, N., Sellegri, K., Simó, R., Thomas, J. L., Willis, M. D., Win-

- ton, V. H. L., and Woodhouse, M. T.: Untangling the influence of Antarctic and Southern Ocean life on clouds, *Elementa*, 11, 00130, <https://doi.org/10.1525/elementa.2022.00130>, 2023.
- Mamouri, R.-E. and Ansmann, A.: Potential of polarization lidar to provide profiles of CCN- and INP-relevant aerosol parameters, *Atmos. Chem. Phys.*, 16, 5905–5931, <https://doi.org/10.5194/acp-16-5905-2016>, 2016.
- 515 McCluskey, C. S., Hill, T. C. J., Humphries, R. S., Rauker, A. M., Moreau, S., Stratton, P. G., Chambers, S. D., Williams, A. G., McRobert, I., Ward, J., Keywood, M. D., Harnwell, J., Ponsonby, W., Loh, Z. M., Krummel, P. B., Protat, A., Kreidenweis, S. M., and DeMott, P. J.: Observations of Ice Nucleating Particles Over Southern Ocean Waters, *Geophys. Res. Lett.*, 45, 11,989–11,997, <https://doi.org/10.1029/2018GL079981>, 2018a.
- McCluskey, C. S., Ovadnevaite, J., Rinaldi, M., Atkinson, J., Belosi, F., Ceburnis, D., Marullo, S., Hill, T. C. J., Lohmann, U., Kanji, Z. A.,  
520 O’Dowd, C., Kreidenweis, S. M., and DeMott, P. J.: Marine and Terrestrial Organic Ice-Nucleating Particles in Pristine Marine to Contin-  
tentially Influenced Northeast Atlantic Air Masses, *J. Geophys. Res. Atmos.*, 123, 6196–6212, <https://doi.org/10.1029/2017JD028033>,  
2018b.
- McCluskey, C. S., DeMott, P. J., Ma, P.-L., and Burrows, S. M.: Numerical Representations of Marine Ice-Nucleating Particles in Remote Ma-  
rine Environments Evaluated Against Observations, *Geophys. Res. Lett.*, 46, 7838–7847, <https://doi.org/10.1029/2018GL081861>, 2019.
- 525 McCoy, D. T., Hartmann, D. L., Zelinka, M. D., Ceppi, P., and Grosvenor, D. P.: Mixed-phase cloud physics and Southern Ocean cloud  
feedback in climate models, *J. Geophys. Res. Atmos.*, 120, 9539–9554, <https://doi.org/10.1002/2015JD023603>, 2015.
- McFarquhar, G. M., Bretherton, C. S., Marchand, R., Protat, A., DeMott, P. J., Alexander, S. P., Roberts, G. C., Twohy, C. H., Toohey,  
D., Siems, S., Huang, Y., Wood, R., Rauber, R. M., Lasher-Trapp, S., Jensen, J., Stith, J., Mace, J., Um, J., Järvinen, E., Schnaiter,  
M., Gettelman, A., Sanchez, K. J., McCluskey, C. S., Russell, L. M., McCoy, I. L., Atlas, R. L., Bardeen, C. G., Moore, K. A., Hill,  
530 T. C. J., Humphries, R. S., Keywood, M. D., Ristovski, Z., Cravigan, L., Schofield, R., Fairall, C., Mallet, M. D., Kreidenweis, S. M.,  
Rainwater, B., D’Alessandro, J., Wang, Y., Wu, W., Saliba, G., Levin, E. J. T., Ding, S., Lang, F., Truong, S. C. H., Wolff, C., Haggerty,  
J., Harvey, M. J., Klekociuk, A. R., and McDonald, A.: Observations of Clouds, Aerosols, Precipitation, and Surface Radiation over  
the Southern Ocean: An Overview of CAPRICORN, MARCUS, MICRE, and SOCRATES, *Bull. Am. Meteorol. Soc.*, 102, E894–E928,  
<https://doi.org/10.1175/BAMS-D-20-0132.1>, 2021.
- 535 Minikin, A., Petzold, A., Ström, J., Krejci, R., Seifert, M., van Velthoven, P., Schlager, H., and Schumann, U.: Aircraft observations of  
the upper tropospheric fine particle aerosol in the Northern and Southern Hemispheres at midlatitudes, *Geophys. Res. Lett.*, 30, 1503,  
<https://doi.org/10.1029/2002GL016458>, 2003.
- Morcrette, J.-J., Boucher, O., Jones, L., Salmond, D., Bechtold, P., Beljaars, A., Benedetti, A., Bonet, A., Kaiser, J. W., Razinger, M., Schulz,  
M., Serrar, S., Simmons, A. J., Sofiev, M., Suttie, M., Tompkins, A. M., and Untch, A.: Aerosol analysis and forecast in the European  
540 Centre for Medium-Range Weather Forecasts Integrated Forecast System: Forward modeling, *J. Geophys. Res. Atmos.*, 114, D06206,  
<https://doi.org/10.1029/2008JD011235>, 2009.
- Nagai, T., Liley, B., Sakai, T., Shibata, T., and Uchino, O.: Post-Pinatubo Evolution and Subsequent Trend of the Stratospheric Aerosol Layer  
Observed by Mid-Latitude Lidars in Both Hemispheres, *SOLA*, 6, 69–72, <https://doi.org/10.2151/sola.2010-018>, 2010.
- Nakamae, K., Uchino, O., Morino, I., Liley, B., Sakai, T., Nagai, T., and Yokota, T.: Lidar observation of the 2011 Puyehue-Cordón Caulle  
545 volcanic aerosols at Lauder, New Zealand, *Atmos. Chem. Phys.*, 14, 12099–12108, <https://doi.org/10.5194/acp-14-12099-2014>, 2014.
- NIWA(2023): NIWA National Climate Centre: New Zealand Climate Summary, January 2020, available at: [https://niwa.co.nz/sites/niwa.co.nz/files/Climate\\_Summary\\_January\\_2020-NIWA.pdf](https://niwa.co.nz/sites/niwa.co.nz/files/Climate_Summary_January_2020-NIWA.pdf), last access: 21 September, 2023.



- Ohneiser, K., Ansmann, A., Baars, H., Seifert, P., Barja, B., Jimenez, C., Radenz, M., Teisseire, A., Floutsi, A., Haarig, M., Foth, A., Chudnovsky, A., Engelmann, R., Zamorano, F., Bühl, J., and Wandinger, U.: Smoke of extreme Australian bushfires observed in the stratosphere over Punta Arenas, Chile, in January 2020: optical thickness, lidar ratios, and depolarization ratios at 355 and 532 nm, *Atmos. Chem. Phys.*, 20, 8003–8015, <https://doi.org/10.5194/acp-20-8003-2020>, 2020.
- 550 Platt, C. M. R.: Lidar Backscatter from Horizontal Ice Crystal Plates, *J. Appl. Meteorol. Climatol.*, 17, 482–488, [https://doi.org/10.1175/1520-0450\(1978\)017<0482:LBFHIC>2.0.CO;2](https://doi.org/10.1175/1520-0450(1978)017<0482:LBFHIC>2.0.CO;2), 1978.
- Poore, K. D., Wang, J., and Rossow, W. B.: Cloud layer thicknesses from a combination of surface and upper-air observations, *J. Clim.*, 8, 550–568, [https://doi.org/10.1175/1520-0442\(1995\)008<0550:CLTFAC>2.0.CO;2](https://doi.org/10.1175/1520-0442(1995)008<0550:CLTFAC>2.0.CO;2), 1995.
- 555 Possner, A., Ekman, A. M. L., and Lohmann, U.: Cloud response and feedback processes in stratiform mixed-phase clouds perturbed by ship exhaust, *Geophys. Res. Lett.*, 44, 1964–1972, <https://doi.org/10.1002/2016GL071358>, 2017.
- Radenz, M., Bühl, J., Seifert, P., Baars, H., Engelmann, R., Barja González, B., Mamouri, R.-E., Zamorano, F., and Ansmann, A.: Hemispheric contrasts in ice formation in stratiform mixed-phase clouds: disentangling the role of aerosol and dynamics with ground-based remote sensing, *Atmos. Chem. Phys.*, 21, 17 969–17 994, <https://doi.org/10.5194/acp-21-17969-2021>, 2021a.
- 560 Radenz, M., Seifert, P., Baars, H., Floutsi, A. A., Yin, Z., and Bühl, J.: Automated time–height-resolved air mass source attribution for profiling remote sensing applications, *Atmos. Chem. Phys.*, 21, 3015–3033, <https://doi.org/10.5194/acp-21-3015-2021>, 2021b.
- Rauber, R. M. and Tokay, A.: An Explanation for the Existence of Supercooled Water at the Top of Cold Clouds, *J. Atmos. Sci.*, 48, 1005 – 1023, [https://doi.org/10.1175/1520-0469\(1991\)048<1005:AEFTEO>2.0.CO;2](https://doi.org/10.1175/1520-0469(1991)048<1005:AEFTEO>2.0.CO;2), 1991.
- 565 Rolph, G., Stein, A., and Stunder, B.: Real-time Environmental Applications and Display sYstem: READY, *Environ. Modell. Soft.*, 95, 210–228, <https://doi.org/10.1016/j.envsoft.2017.06.025>, 2017.
- Sakai, T., Uchino, O., Nagai, T., Liley, B., Morino, I., and Fujimoto, T.: Long-term variation of stratospheric aerosols observed with lidars over Tsukuba, Japan, from 1982 and Lauder, New Zealand, from 1992 to 2015, *J. Geophys. Res. Atmos.*, 121, 10,283–10,293, <https://doi.org/10.1002/2016JD025132>, 2016.
- 570 Sasano, Y., Browell, E. V., and Ismail, S.: Error caused by using a constant extinction/backscattering ratio in the lidar solution, *Appl. Opt.*, 24, 3929–3932, <https://doi.org/10.1364/AO.24.003929>, 1985.
- Schuddeboom, A. J. and McDonald, A. J.: The Southern Ocean Radiative Bias, Cloud Compensating Errors, and Equilibrium Climate Sensitivity in CMIP6 Models, *J. Geophys. Res. Atmos.*, 126, e2021JD035 310, <https://doi.org/10.1029/2021JD035310>, 2021.
- Seifert, A., Köhler, C., and Beheng, K. D.: Aerosol-cloud-precipitation effects over Germany as simulated by a convective-scale numerical weather prediction model, *Atmos. Chem. Phys.*, 12, 709–725, <https://doi.org/10.5194/acp-12-709-2012>, 2012.
- 575 Seifert, P., Ansmann, A., Mattis, I., Wandinger, U., Tesche, M., Engelmann, R., Müller, D., Pérez, C., and Hausteine, K.: Saharan dust and heterogeneous ice formation: Eleven years of cloud observations at a central European EARLINET site, *J. Geophys. Res. Atmos.*, 115, D20 201, <https://doi.org/10.1029/2009JD013222>, 2010.
- Seifert, P., Ansmann, A., Groß, S., Freudenthaler, V., Heinold, B., Hiebsch, A., Mattis, I., Schmidt, J., Schnell, F., Tesche, M., Wandinger, U., and Wiegner, M.: Ice formation in ash-influenced clouds after the eruption of the Eyjafjallajökull volcano in April 2010, *J. Geophys. Res. Atmos.*, 116, D00U04, <https://doi.org/https://doi.org/10.1029/2011JD015702>, 2011.
- 580 Seifert, P., Kunz, C., Baars, H., Ansmann, A., Bühl, J., Senf, F., Engelmann, R., Althausen, D., and Artaxo, P.: Seasonal variability of heterogeneous ice formation in stratiform clouds over the Amazon Basin, *Geophys. Res. Lett.*, 42, 5587–5593, <https://doi.org/10.1002/2015GL064068>, 2015.

- 585 Shupe, M. D. and Intrieri, J. M.: Cloud Radiative Forcing of the Arctic Surface: The Influence of Cloud Properties, Surface Albedo, and Solar Zenith Angle, *J. Clim.*, 17, 616–628, [https://doi.org/10.1175/1520-0442\(2004\)017<0616:CRFOTA>2.0.CO;2](https://doi.org/10.1175/1520-0442(2004)017<0616:CRFOTA>2.0.CO;2), 2004.
- Solomon, A., de Boer, G., Creamean, J. M., McComiskey, A., Shupe, M. D., Maahn, M., and Cox, C.: The relative impact of cloud condensation nuclei and ice nucleating particle concentrations on phase partitioning in Arctic mixed-phase stratocumulus clouds, *Atmos. Chem. Phys.*, 18, 17 047–17 059, <https://doi.org/10.5194/acp-18-17047-2018>, 2018.
- 590 Stein, A. F., Draxler, R. R., Rolph, G. D., Stunder, B. J. B., Cohen, M. D., and Ngan, F.: NOAA’s HYSPLIT atmospheric transport and dispersion modeling system, *Bull. Am. Meteorol. Soc.*, 96, 2059–2077, <https://doi.org/10.1175/BAMS-D-14-00110.1>, 2015.
- Stephens, G. L.: Cloud Feedbacks in the Climate System: A Critical Review, *J. Clim.*, 18, 237–273, <https://doi.org/10.1175/JCLI-3243.1>, 2005.
- Sun, Z. and Shine, K. P.: Studies of the radiative properties of ice and mixed-phase clouds, *Q. J. R. Meteorol. Soc.*, 120, 111–137, <https://doi.org/https://doi.org/10.1002/qj.49712051508>, 1994.
- 595 Tan, I., Storelvmo, T., and Choi, Y.-S.: Spaceborne lidar observations of the ice-nucleating potential of dust, polluted dust, and smoke aerosols in mixed-phase clouds, *J. Geophys. Res. Atmos.*, 119, 6653–6665, <https://doi.org/10.1002/2013JD021333>, 2014.
- Tatzelt, C., Henning, S., Welti, A., Baccharini, A., Hartmann, M., Gysel-Beer, M., van Pinxteren, M., Modini, R. L., Schmale, J., and Stratmann, F.: Circum-Antarctic abundance and properties of CCN and INPs, *Atmos. Chem. Phys.*, 22, 9721–9745, <https://doi.org/10.5194/acp-22-9721-2022>, 2022.
- 600 Tegen, I., Hollrig, P., Chin, M., Fung, I., Jacob, D., and Penner, J.: Contribution of different aerosol species to the global aerosol extinction optical thickness: Estimates from model results, *J. Geophys. Res. Atmos.*, 102, 23 895–23 915, <https://doi.org/10.1029/97JD01864>, 1997.
- Tradowsky, J. S., Bodeker, G. E., Querel, R. R., Builtjes, P. J. H., and Fischer, J.: Combining data from the distributed GRUAN site Lauder–Invercargill, New Zealand, to provide a site atmospheric state best estimate of temperature, *Earth Syst. Sci. Data*, 10, 2195–2211, <https://doi.org/10.5194/essd-10-2195-2018>, 2018.
- 605 Trenberth, K. E. and Fasullo, J. T.: Simulation of Present-Day and Twenty-First-Century Energy Budgets of the Southern Oceans, *J. Clim.*, 23, 440–454, <https://doi.org/10.1175/2009JCLI3152.1>, 2010.
- Uchino, O., Tabata, I., Kai, K., and Okada, Y.: Polarization Properties of Middle and High Level Clouds Observed by Lidar, *J. Meteorol. Soc. Jpn.*, 66, 607–616, [https://doi.org/10.2151/jmsj1965.66.4\\_607](https://doi.org/10.2151/jmsj1965.66.4_607), 1988.
- 610 Uchino, O., Nagai, T., Fujimoto, T., Matthews, W. A., and Orange, J.: Extensive lidar observations of the Pinatubo aerosol layers at Tsukuba (36.1°N), Naha (26.2°N), Japan and Lauder (45.0°S), New Zealand, *Geophys. Res. Lett.*, 22, 57–60, <https://doi.org/10.1029/94GL02735>, 1995.
- U.S. Government Printing Office: U.S. Standard Atmosphere, 1976, U.S. Government Printing Office, Washington, D.C., 1976.
- Varma, V., Morgenstern, O., Field, P., Furtado, K., Williams, J., and Hyder, P.: Improving the Southern Ocean cloud albedo biases in a general circulation model, *Atmos. Chem. Phys.*, 20, 7741–7751, <https://doi.org/10.5194/acp-20-7741-2020>, 2020.
- 615 Vergara-Temprado, J., Murray, B. J., Wilson, T. W., O’Sullivan, D., Browse, J., Pringle, K. J., Ardon-Dryer, K., Bertram, A. K., Burrows, S. M., Ceburnis, D., DeMott, P. J., Mason, R. H., O’Dowd, C. D., Rinaldi, M., and Carslaw, K. S.: Contribution of feldspar and marine organic aerosols to global ice nucleating particle concentrations, *Atmos. Chem. Phys.*, 17, 3637–3658, <https://doi.org/10.5194/acp-17-3637-2017>, 2017.
- 620 Villanueva, D., Heinold, B., Seifert, P., Deneke, H., Radenz, M., and Tegen, I.: The day-to-day co-variability between mineral dust and cloud glaciation: a proxy for heterogeneous freezing, *Atmos. Chem. Phys.*, 20, 2177–2199, <https://doi.org/10.5194/acp-20-2177-2020>, 2020.

- Villanueva, D., Neubauer, D., Gasparini, B., Ickes, L., and Tegen, I.: Constraining the Impact of Dust-Driven Droplet Freezing on Climate Using Cloud-Top-Phase Observations, *Geophys. Res. Lett.*, 48, e2021GL092687, <https://doi.org/10.1029/2021GL092687>, 2021.
- 625 Welter, A., Bigg, E. K., DeMott, P. J., Gong, X., Hartmann, M., Harvey, M., Henning, S., Herenz, P., Hill, T. C. J., Hornblow, B., Leck, C., Löffler, M., McCluskey, C. S., Rauker, A. M., Schmale, J., Tatzelt, C., van Pinxteren, M., and Stratmann, F.: Ship-based measurements of ice nuclei concentrations over the Arctic, Atlantic, Pacific and Southern oceans, *Atmos. Chem. Phys.*, 20, 15 191–15 206, <https://doi.org/10.5194/acp-20-15191-2020>, 2020.
- Westbrook, C. D., Illingworth, A. J., O'Connor, E. J., and Hogan, R. J.: Doppler lidar measurements of oriented planar ice crystals falling from supercooled and glaciated layer clouds, *Q. J. R. Meteorol. Soc.*, 136, 260–276, <https://doi.org/10.1002/qj.528>, 2010.
- 630 Wilson, T. W., Ladino, L. A., Alpert, P. A., Breckels, M. N., Brooks, I. M., Browse, J., Burrows, S. M., Carslaw, K. S., Huffman, J. A., Judd, C., Kilitau, W. P., Mason, R. H., McFiggans, G., Miller, L. A., Nájera, J. J., Polishchuk, E., Rae, S., Schiller, C. L., Si, M., Vergara-Temprado, J., Whale, T. F., Wong, J. P. S., Wurl, O., Yakobi-Hancock, J. D., Abbatt, J. P. D., Aller, J. Y., Bertram, A. K., Knopf, D., and Murray, B. J.: A marine biogenic source of atmospheric ice nucleating particles, *Nature*, 525, 234–238, <https://doi.org/10.1038/nature14986>, 2015.
- 635 Zelinka, M. D., Myers, T. A., McCoy, D. T., Po-Chedley, S., Caldwell, P. M., Ceppi, P., Klein, S. A., and Taylor, K. E.: Causes of Higher Climate Sensitivity in CMIP6 Models, *Geophys. Res. Lett.*, 47, e2019GL085782, <https://doi.org/10.1029/2019GL085782>, 2020.
- Zhang, D., Wang, Z., Kollias, P., Vogelmann, A. M., Yang, K., and Luo, T.: Ice particle production in mid-level stratiform mixed-phase clouds observed with collocated A-Train measurements, *Atmos. Chem. Phys.*, 18, 4317–4327, <https://doi.org/10.5194/acp-18-4317-2018>, 2018.
- 640 Zhao, X., Liu, X., Burrows, S. M., and Shi, Y.: Effects of marine organic aerosols as sources of immersion-mode ice-nucleating particles on high-latitude mixed-phase clouds, *Atmos. Chem. Phys.*, 21, 2305–2327, <https://doi.org/10.5194/acp-21-2305-2021>, 2021.
- Zuidema, P., Baker, B., Han, Y., Intrieri, J., Key, J., Lawson, P., Matrosov, S., Shupe, M., Stone, R., and Uttal, T.: An Arctic Springtime Mixed-Phase Cloudy Boundary Layer Observed during SHEBA, *J. Atmos. Sci.*, 62, 160–176, <https://doi.org/10.1175/JAS-3368.1>, 2005.

**Table 1.** Overview on the extent of the 11-year Lauder cloud dataset. Number (N) of categorized liquid (liq) and ice-containing (ice) clouds, including relative time of cloud occurrence ( $t_{\text{sampled}}$ ), for the full dataset and for the subdataset covering the heterogeneous freezing range  $-40^{\circ}\text{C}$  to  $0^{\circ}\text{C}$ , and for clouds with a well-defined (WD) cloud-top (see Sect. 2).

| Year    | N    | $N_{\text{WD}}$ | $t_{\text{sampled}}$ | $N_{-40\text{ to }0^{\circ}\text{C}}$ | $N_{-40\text{ to }0^{\circ}\text{C,ice}}$ | $N_{-40\text{ to }0^{\circ}\text{C,ice,WD}}$ | $N_{-40\text{ to }0^{\circ}\text{C,liq,WD}}$ |
|---------|------|-----------------|----------------------|---------------------------------------|-------------------------------------------|----------------------------------------------|----------------------------------------------|
| 2009    | 195  | 108             | 2.6%                 | 124                                   | 18                                        | 11                                           | 72                                           |
| 2010    | 198  | 110             | 3.3%                 | 93                                    | 28                                        | 12                                           | 48                                           |
| 2011    | 269  | 138             | 8.6%                 | 118                                   | 32                                        | 9                                            | 52                                           |
| 2012    | 155  | 96              | 1.5%                 | 79                                    | 19                                        | 13                                           | 39                                           |
| 2013    | 126  | 69              | 1.4%                 | 42                                    | 17                                        | 9                                            | 17                                           |
| 2014    | 309  | 108             | 4.3%                 | 133                                   | 43                                        | 18                                           | 38                                           |
| 2015    | 393  | 191             | 8.8%                 | 187                                   | 48                                        | 16                                           | 83                                           |
| 2016    | 268  | 184             | 3.2%                 | 129                                   | 38                                        | 22                                           | 76                                           |
| 2017    | 315  | 197             | 5.2%                 | 153                                   | 46                                        | 27                                           | 83                                           |
| 2018    | 282  | 174             | 4.5%                 | 140                                   | 44                                        | 29                                           | 62                                           |
| 2019    | 367  | 221             | 8.9%                 | 163                                   | 59                                        | 28                                           | 76                                           |
| 2020    | 483  | 267             | 59.3%                | 215                                   | 81                                        | 42                                           | 91                                           |
| 2009–20 | 3360 | 1863            | 6.1%                 | 1576                                  | 473                                       | 236                                          | 737                                          |

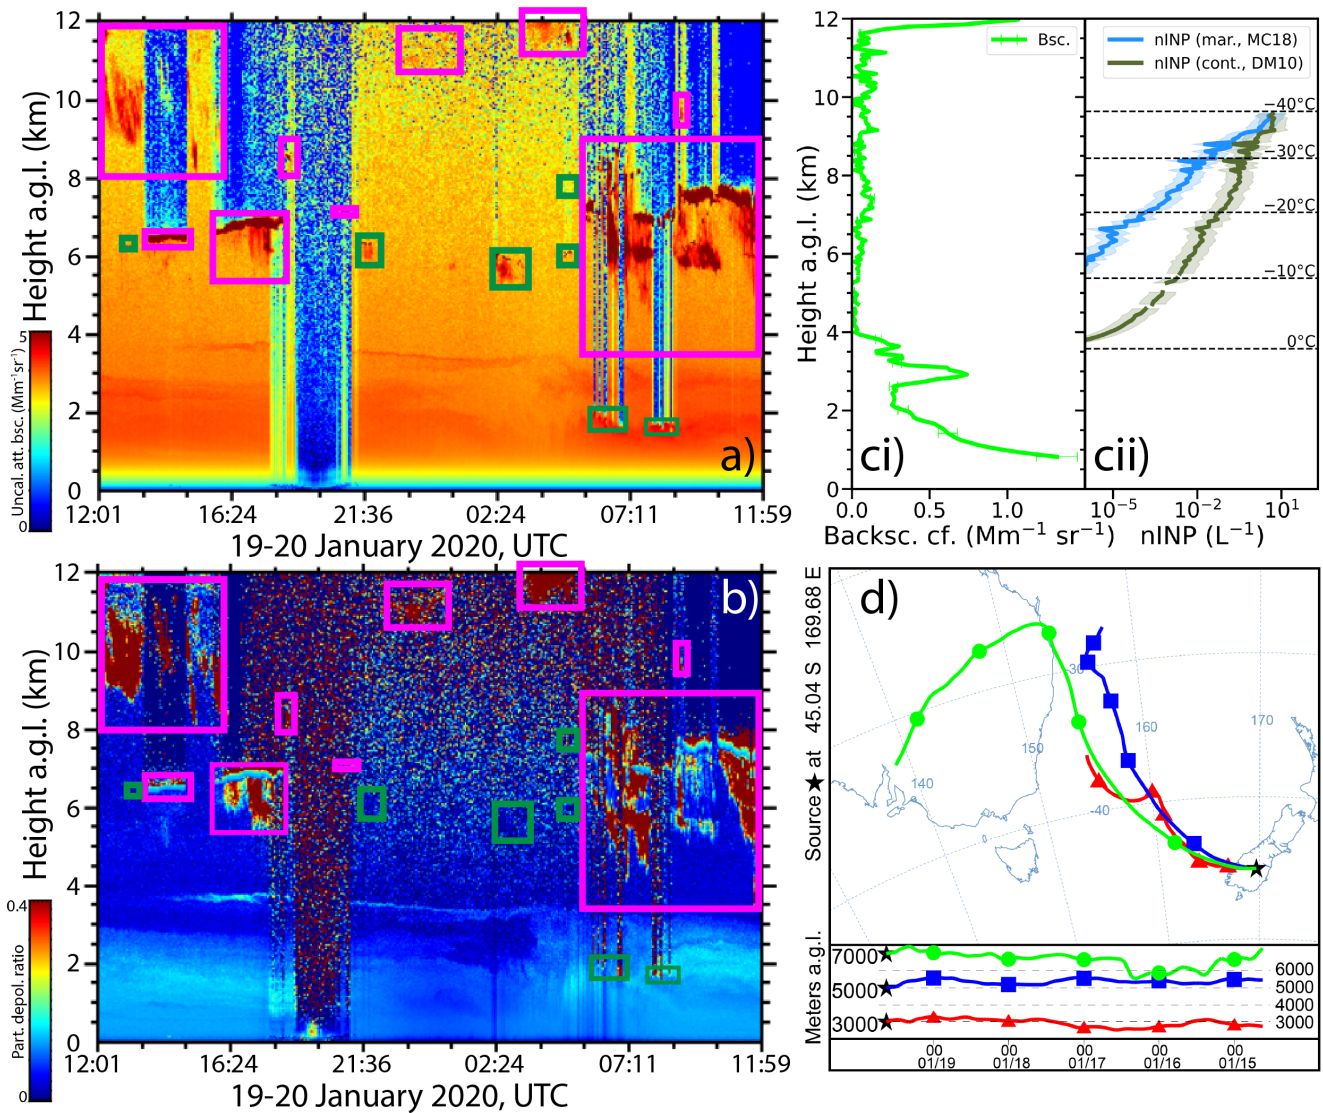

**Figure 1.** Measurement example from Lauder on 19–20 January 2020 corresponding to the Australian cluster 1 from Fig. 9. Temporal development of the uncalibrated attenuated backscatter (a) and particle depolarization ratio (b) at 532 nm wavelength from 19 January 2020, 12:01 UTC – 20 January 2020, 11:59 UTC with indicated liquid (green rectangles) and ice-containing clouds (magenta rectangles). Vertical profiles of the particle backscatter coefficient at 532 nm wavelength (20 January 2020, 04:30–04:40 UTC, light green, evaluated with the Klett-Fernald-Sasano algorithm) (ci) and INP concentration obtained with conversion parameters from Mamouri and Ansmann (2016) and the parameterizations of McCluskey et al. (2018b, MC18, marine, light blue) and DeMott et al. (2010, DM10, continental, dark green) (cii). The dashed lines indicate the temperatures from GDAS (20 January 2020, 03 UTC). Error bars and shaded areas indicate the uncertainty in the retrieved values. HYSPLIT backward trajectories for 120 h arriving at 3, 5, and 7 km height above Lauder at 19 January 2020, 15:00 UTC (d).

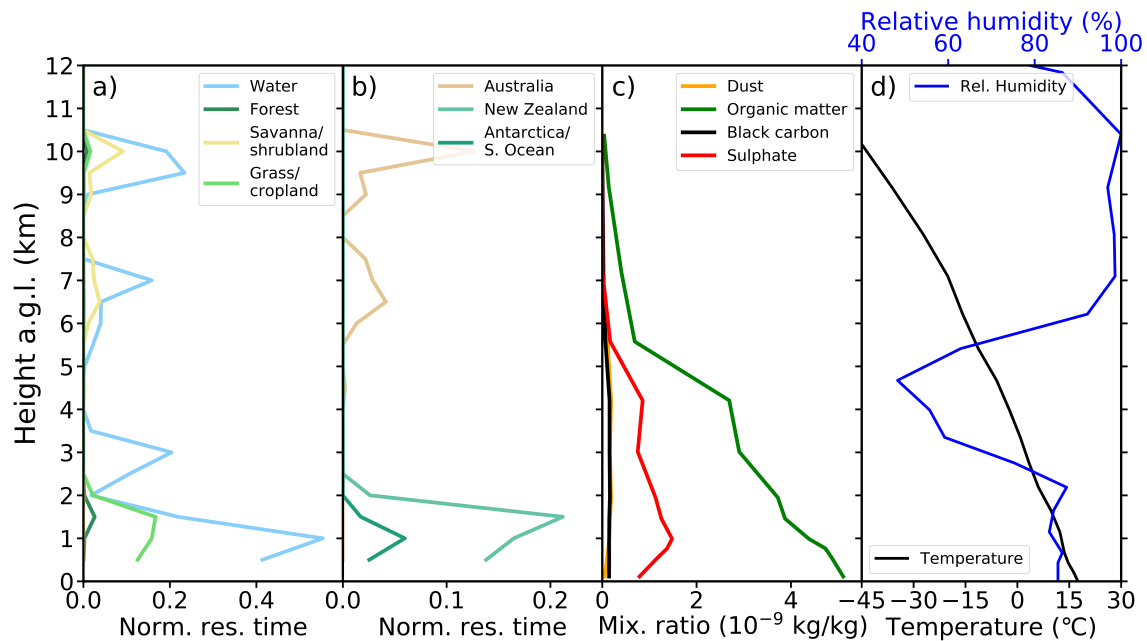

**Figure 2.** Vertical profiles at 19 January 2020, 15:00 UTC of TRACE normed residence times of surface type (a) and named geographical area classifications (b), MACC aerosol mixing ratios excluding sea salt (c), and temperature and relative humidity from GDAS (d).

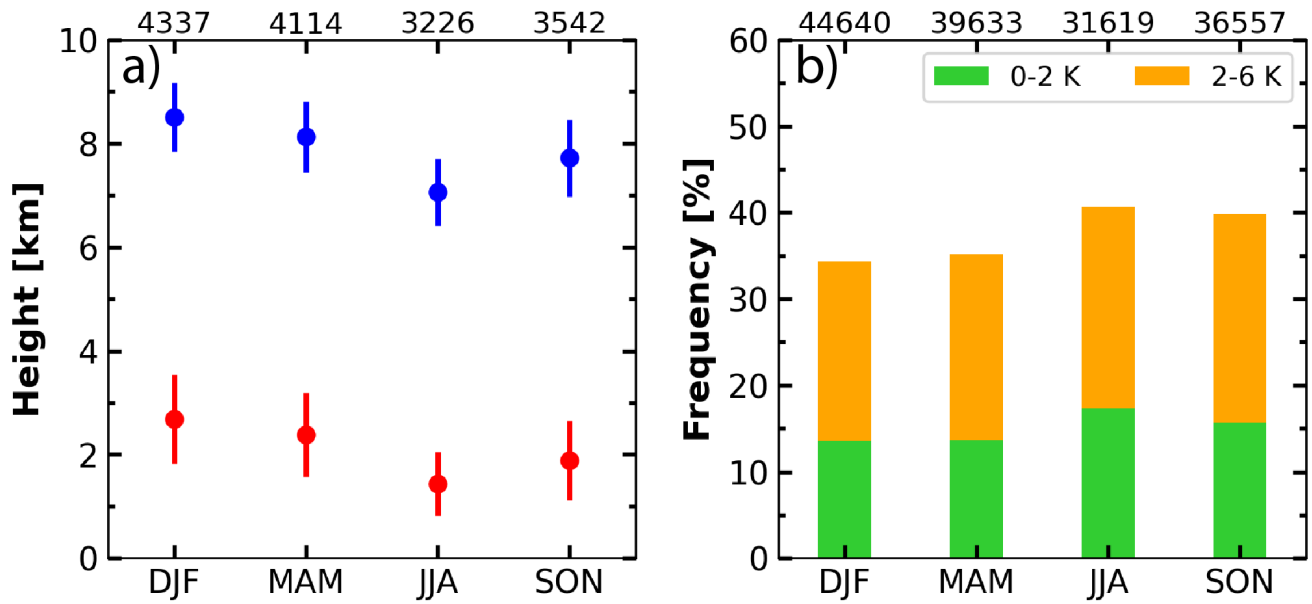

**Figure 3.** Seasonal occurrence of the heterogeneous freezing regime at Invercargill based on radiosoundings. The left panel (a) shows the average heights of the 0°C (red) and -35°C isotherm (blue). Frequencies of dew point spreads of 0–2 K (green) and 2–6 K (orange) within the heterogeneous freezing temperature range are shown in the right panel (b). The number of observations are given on the top of each plot. Soundings from 1950–2022 were used.



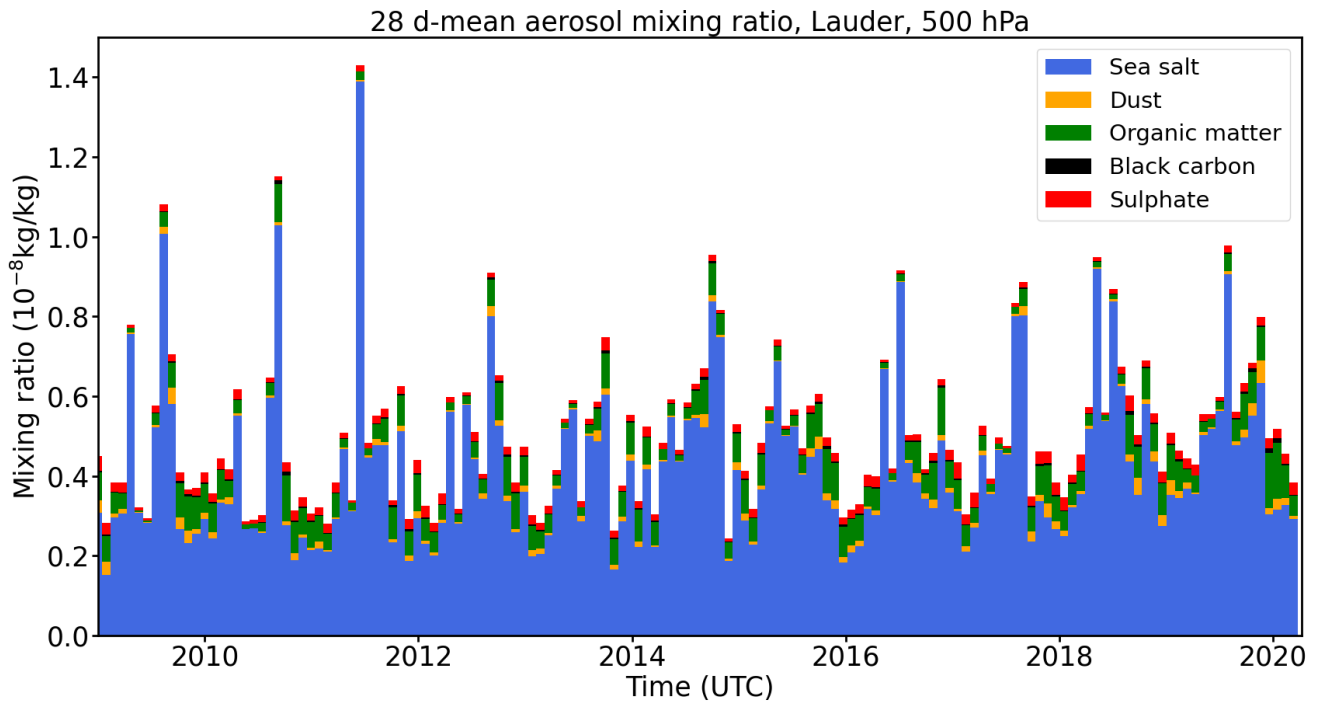

**Figure 4.** Time series of 28 d-mean CAMS-MACC sea salt (blue), dust (orange), organic matter (green), black carbon (black), and sulphate (red) aerosol mixing ratios at 500 hPa above Lauder from January 2009 to April 2020.

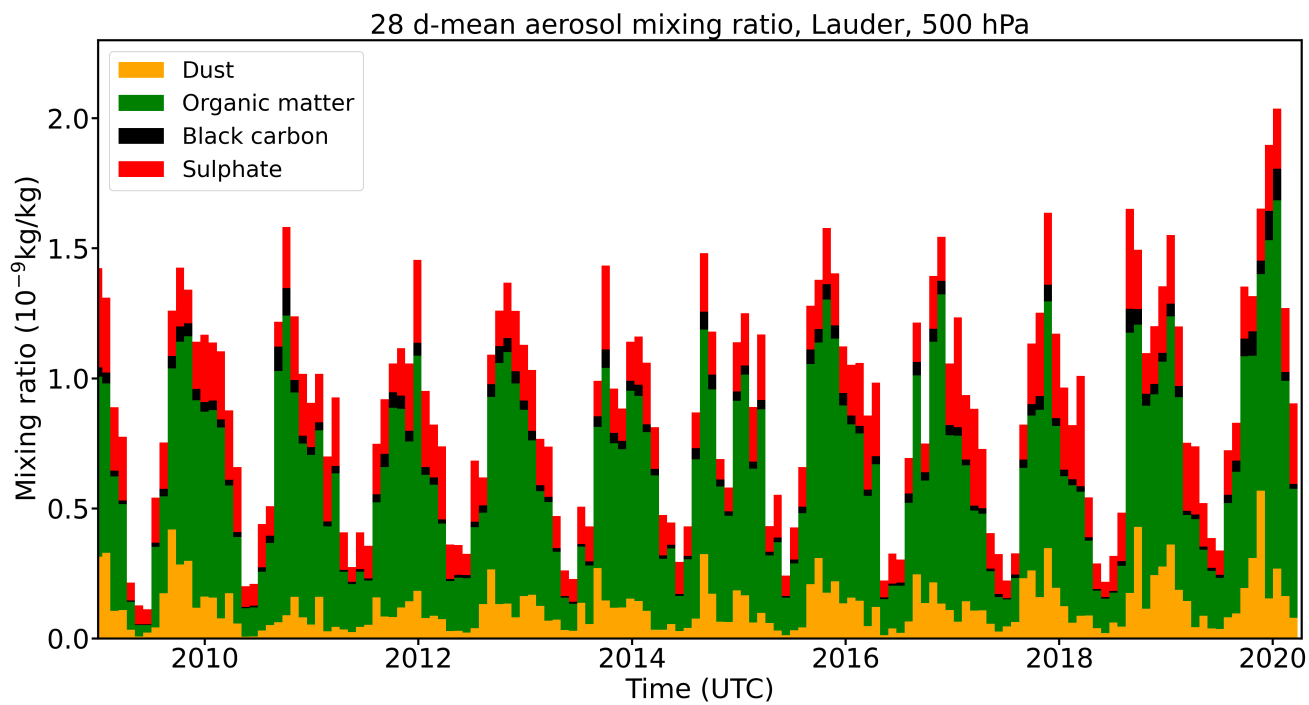

**Figure 5.** Same as Fig. 4 but excluding sea salt.

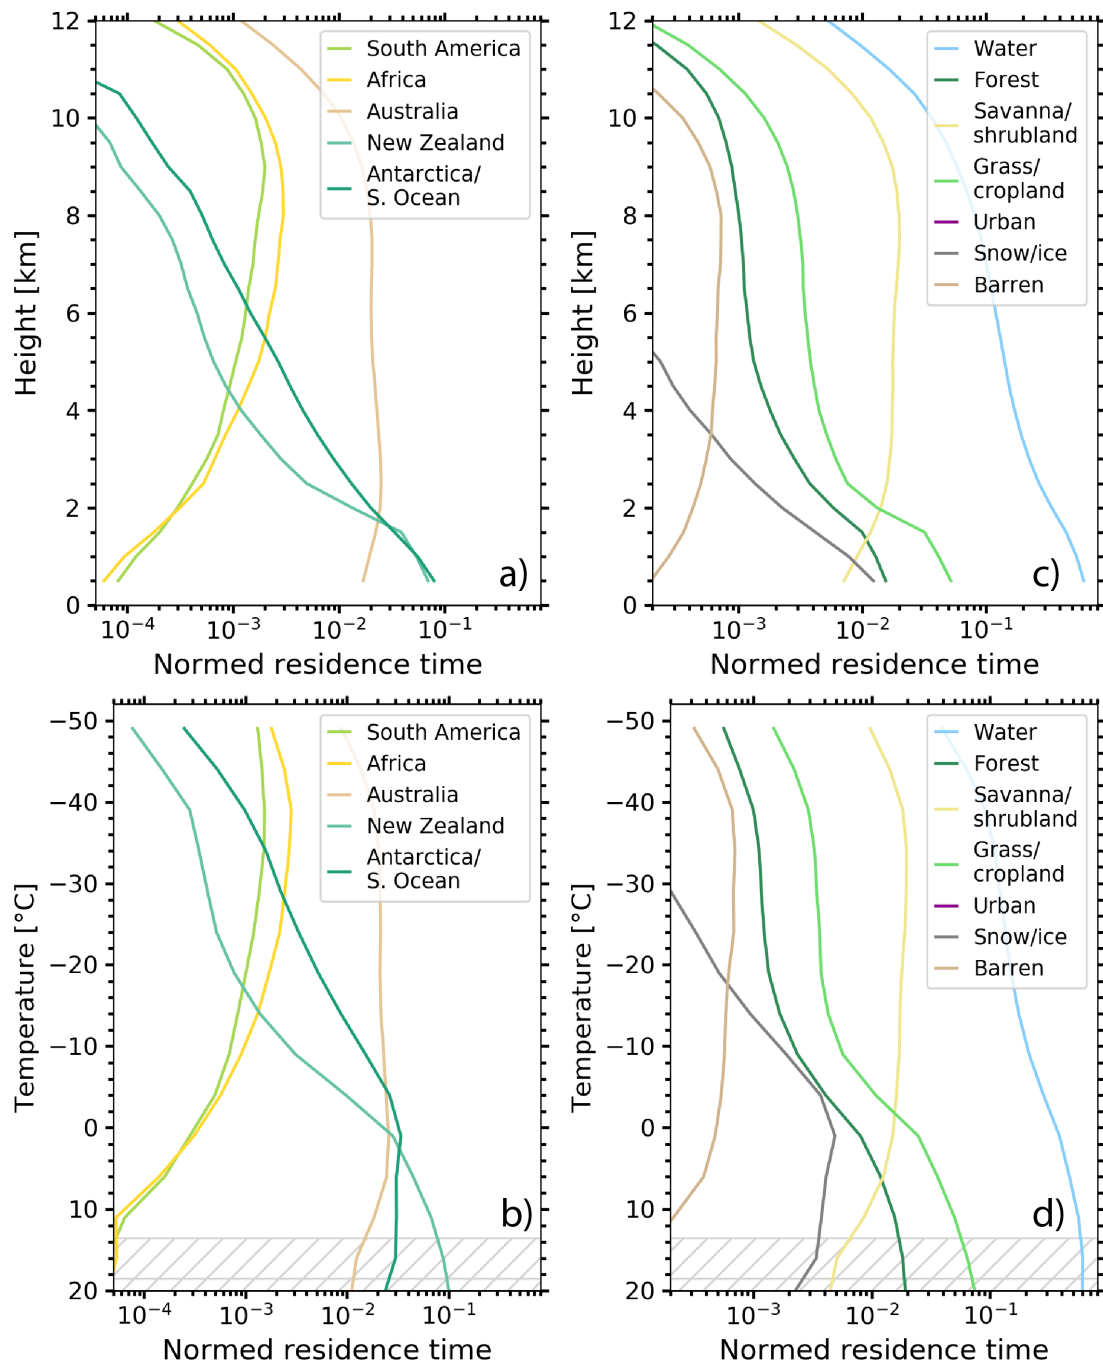

**Figure 6.** Profiles of normed residence times of trajectories above named geographical areas (a,b) and surface cover classifications (c,d) in terms of kilometers above ground (a,c) and temperature (b,d) from the temporally and vertically resolved air mass source attribution tool TRACE (Radenz et al., 2021b).

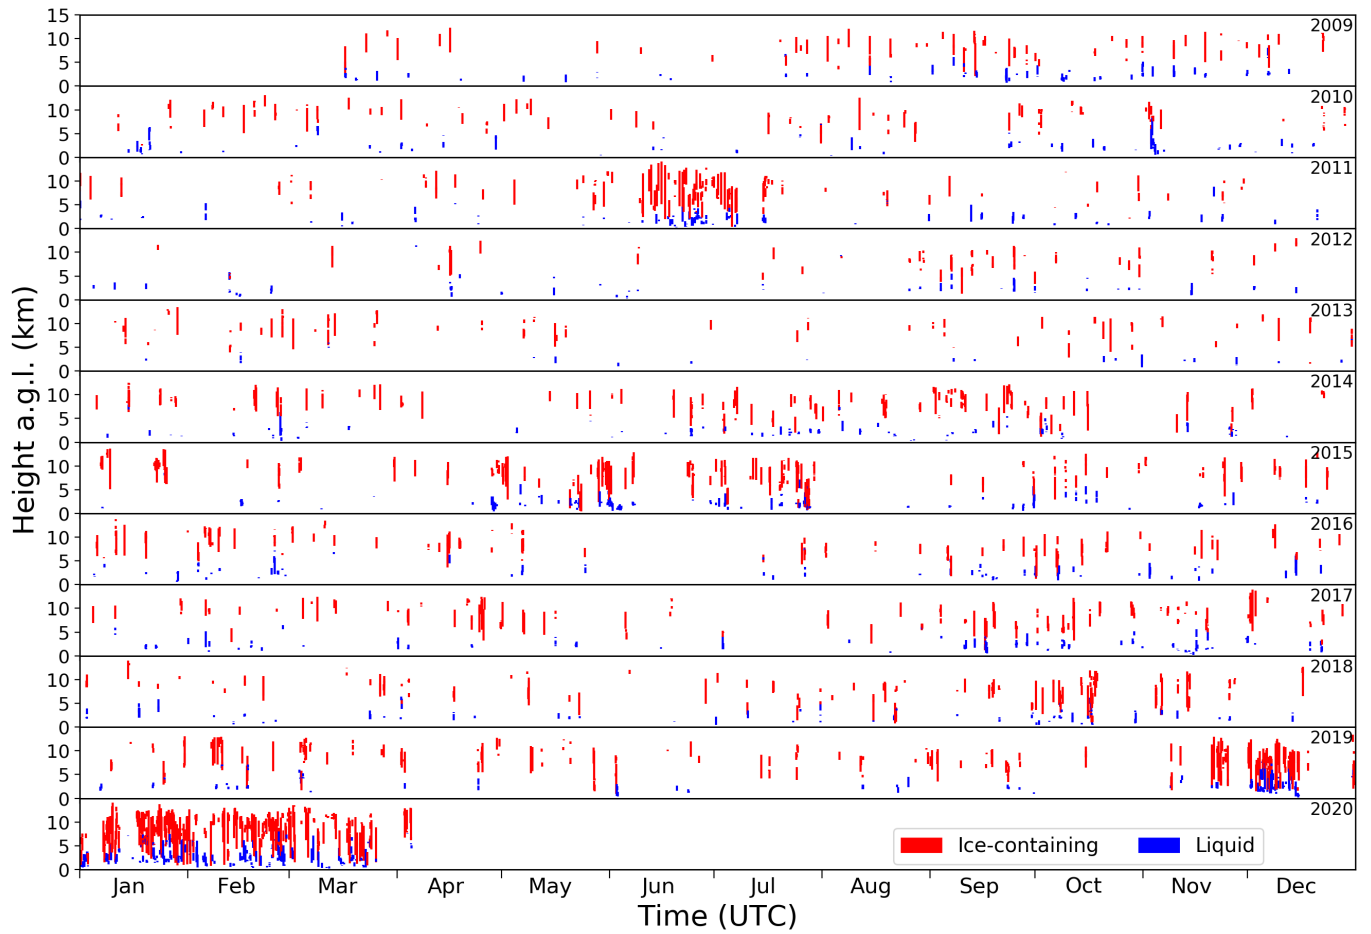

**Figure 7.** Classified liquid (blue) and ice-containing clouds (red) in the height range 0–15 km a.g.l above Lauder during the analyzed years 2009–2020 (top to bottom).

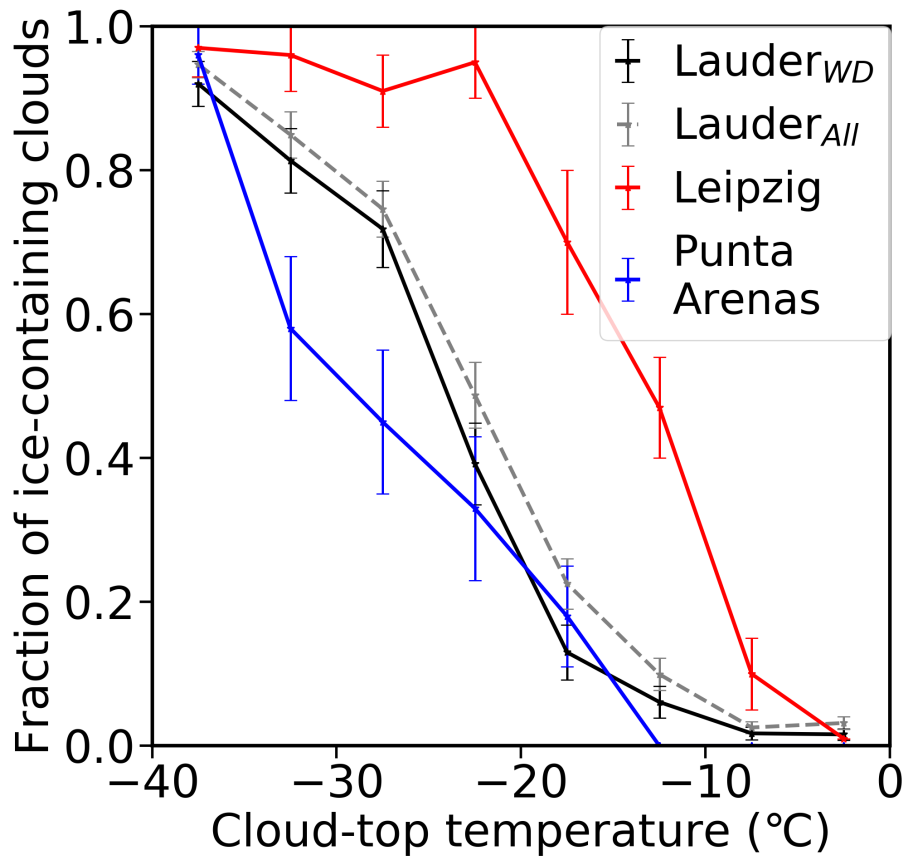

**Figure 8.** Fraction of ice-containing clouds as function of cloud-top temperature in intervals of 5 K for Leipzig (red, Seifert et al., 2010), Punta Arenas (blue, Kanitz et al., 2011), and Lauder considering only well-defined clouds (black, this study) and all clouds (grey, this study). The error bars represent the statistical significance calculated with Eq. 1.

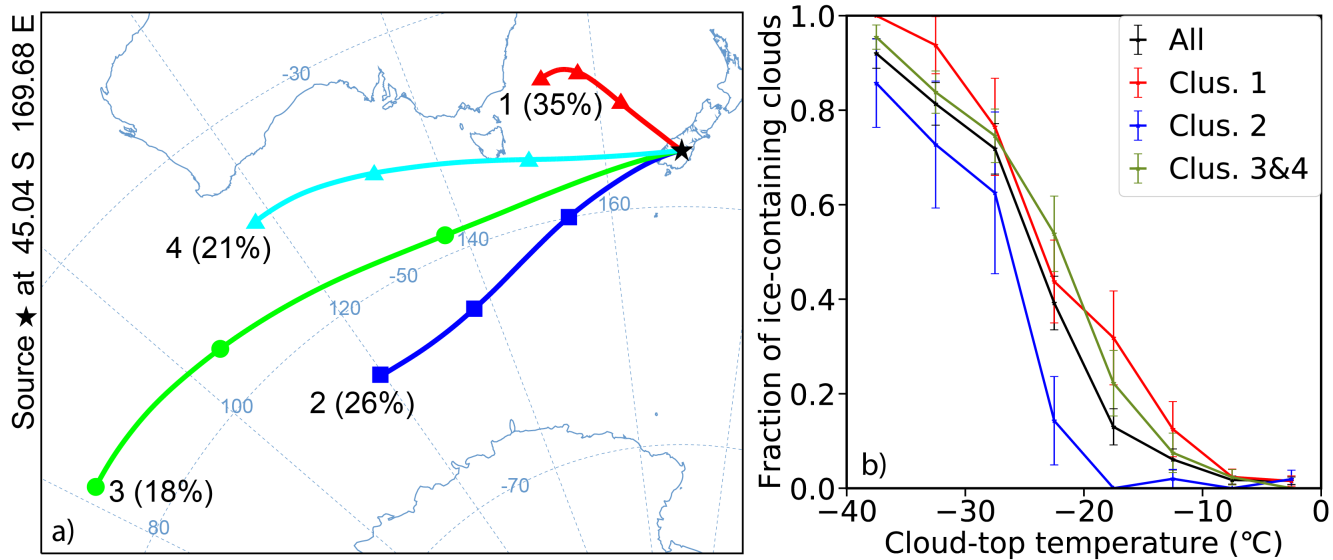

**Figure 9.** Clusters of 1544 72 h HYSPLIT backward trajectories arriving at cloud middle height and cloud start time rounded to full hour (the four clusters explain about 85% of the clustered backward trajectories' total spatial variance) (a) and same as Fig. 8 but all well-defined clouds (black, same as in Fig. 8) and well-defined clouds corresponding to cluster 1 (red), to cluster 2 (blue), and to clusters 3 and 4 (lightbluegreen) (b).

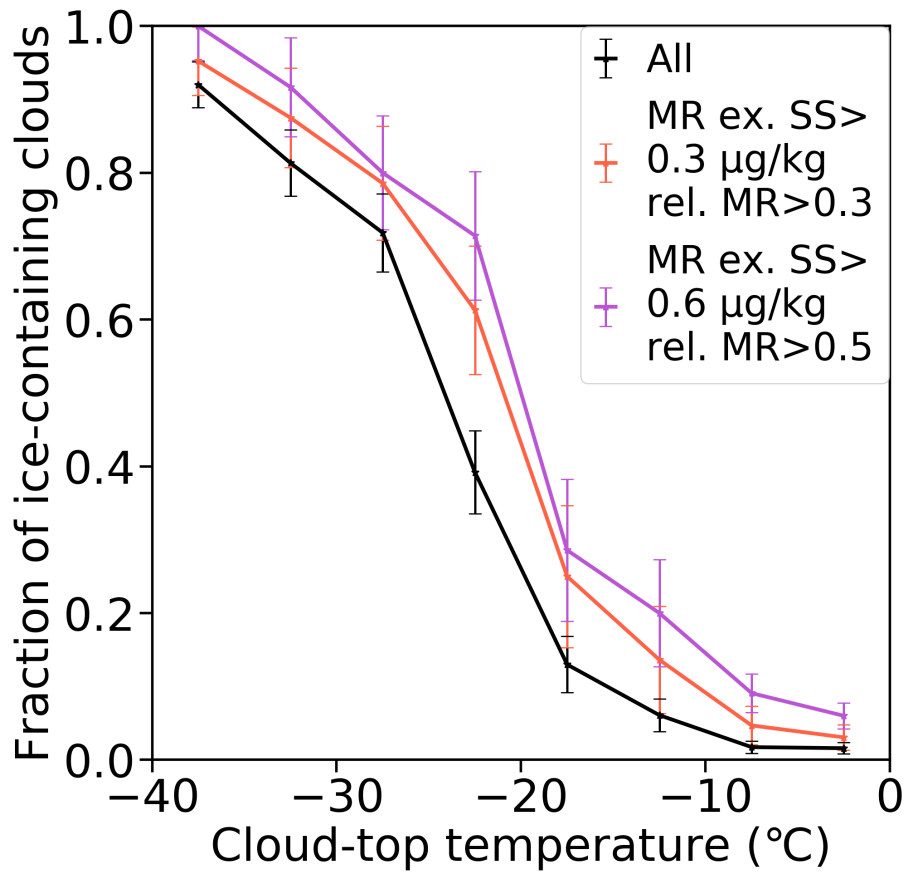

**Figure 10.** Same as Fig. 8 but for all **well-defined** clouds (black, same as in Fig. 8) and for **well-defined** clouds corresponding to a combination of criteria, namely MACC total aerosol mixing ratio excluding sea salt relative to sea salt >0.3 and MACC total aerosol mixing ratio excluding sea salt >0.5 µg/kg (orange), and >0.5 and >1.3 µg/kg, respectively (violet).
